# Supplementary material for: Study of miRNA and lymphocyte subsets as potential biomarkers for the diagnosis and prognosis of gastric cancer
Source: PeerJ journal article supplement (doi:10.7717/peerj.16660), 2024-01-19

Hepatitis B

Proteoglycans in cancer

MAPK signaling pathway

Signaling pathways regulating pluripotency of stem cells

AGE–RAGE signaling pathway in diabetic complications

PI3K–Akt signaling pathway

Neurotrophin signaling pathway

Cellular senescence

Human papillomavirus infection

Breast cancer

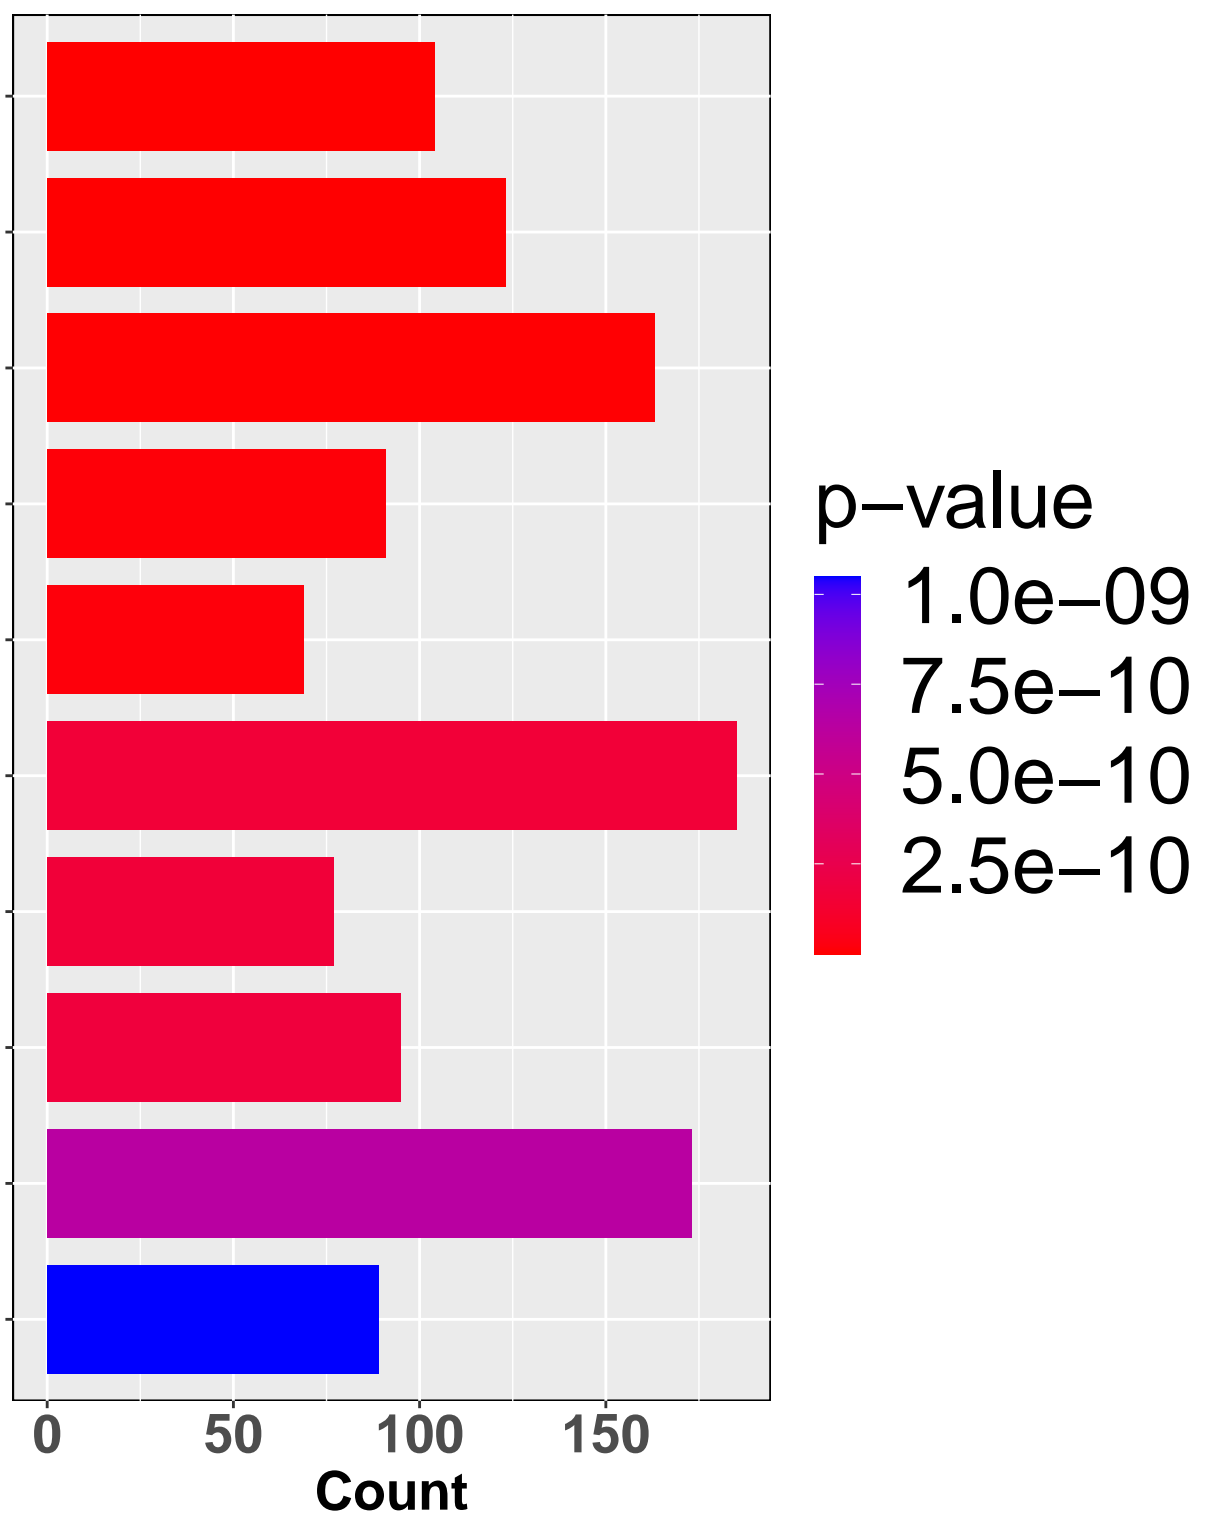

Supplement: SequenceData.zip [file SequenceData.zip]
