# Supplementary material for: Study of miRNA and lymphocyte subsets as potential biomarkers for the diagnosis and prognosis of gastric cancer
Source: PeerJ. 2024 Jan 19;12:e16660. doi: 10.7717/peerj.16660 (PMC10802158; doi:10.7717/peerj.16660)
Supplement: Supplemental Information 1 — RNAseq DATA [file peerj-12-16660-s001.xlsx]

## Sheet: Date Formatting
ID	FC(C/H)	pvalue	qvalue	C-1	C-2	C-3	C-4	C-5	H-1	H-2	H-3	H-4	H-5
hsa-let-7a-3p	4.30678	0.0716576	0.390323	4.1376	3.16727	4.61549	0.725882	2.20284	4.7975	2.54136	0.856661	2.89002	1.36145
hsa-let-7a-5p	0.655685	0.248781	0.626009	4489.86	5300.77	8459.61	1155.24	2143.12	6600.91	20171.5	76.8547	6300.24	31.5728
hsa-let-7b-3p	1.29662	0.635724	0.923449	4.63696	8.79796	8.0771	8.34764	1.10142	5.25132	4.06618	5.75187	9.43058	14.0684
hsa-let-7b-5p	1.55294	0.0102776	0.135958	8879.36	3820.78	5961.19	2835.29	7300.71	9578.8	28183.2	0.611901	5771.67	1.36145
hsa-let-7c-5p	0.32504	0.2628	0.650675	68.8411	92.7305	102.695	150.258	32.0636	27.8126	132.405	5.62949	122.902	2.20426
hsa-let-7d-3p	1.64406	0.506025	0.833385	133.973	193.379	208.274	175.663	93.7432	123.568	163.409	133.15	256.147	60.7468
hsa-let-7d-5p	1.48778	0.0199337	0.184586	698.327	402.419	423.471	297.975	656.57	994.38	1337.26	3.30426	526.439	2.59325
hsa-let-7e-5p	0.271072	0.904589	1	21.7581	111.206	40.9624	86.7429	14.1961	10.373	40.6618	3.79379	85.0273	2.20426
hsa-let-7f-2-3p	6.93672	0.453766	0.787666	0.35669	1.23171	0.576936	0.362941	0.24476	1.36145	0	0	0.304212	0.0648311
hsa-let-7f-5p	0.439303	0.123267	0.472461	1.71211	1.23171	1.15387	574.898	826.923	2719.8	0	63.2705	1.52106	22.0426
hsa-let-7g-3p	443.295	0.582035	0.894823	2111.89	2895.58	4485.68	0.362941	3.18188	4.66784	12850.1	23.1299	2965.92	8.7522
hsa-let-7g-5p	1.61451	0.0905662	0.423557	4.42295	2.46343	2.01928	170.945	488.052	737.26	0	18.6018	2.89002	9.07636
hsa-let-7i-3p	15.3888	0.0309873	0.235783	802.052	480.721	1134.54	11.9771	12.9723	16.6616	1707.03	106.96	1047.4	66.4519
hsa-let-7i-5p	2.00168	0.0867919	0.41859	18.4765	8.44604	12.6926	1315.66	5769.12	6086.41	3.04963	0.611901	6.38846	0.0648311
hsa-miR-1-3p	7.70672	0.000601807	0.0309596	5942.45	2266.88	4073.46	7.9847	5.75187	14.0684	8351.16	0.36714	4083.44	1.16696
hsa-miR-100-5p	1.44762	0.541801	0.864712	77.1876	28.6813	32.3084	60.6111	52.0116	6.0293	24.3971	1.59094	35.7449	0.648311
hsa-miR-101-3p	3.54537	0.811606	1	23.1135	25.1622	15.0003	237.363	152.119	764.618	14.994	36.3469	18.2527	11.4751
hsa-miR-103a-3p	1.21271	0.454419	0.787666	810.113	219.421	285.006	616.637	780.908	685.46	246.512	0.36714	287.176	0.129662
hsa-miR-10526-3p	1.18969	0.2193	0.601506	936.167	1331.84	1272.43	0.362941	0.24476	1085.46	1584.03	10.0352	1053.94	5.18649
hsa-miR-10527-5p	3.54779	0.395614	0.750693	0.285352	1.75959	1.15387	2.90353	3.54902	10.373	0	1.10142	0.152106	1.10213
hsa-miR-106a-5p	2.17919	0.0707407	0.390323	1.63316	1.05576	3.17315	0	2.08046	123.88	5.84513	7.22043	4.8674	19.3845
hsa-miR-106b-3p	7.22783	0.148455	0.494494	1.56943	0	0.288468	144.451	385.742	288.499	2.7955	0	1.21685	0.194493
hsa-miR-106b-5p	24.0908	0.215827	0.601506	456.42	79.7095	116.83	7.9847	9.66803	65.5443	272.434	1.10142	172.184	0.842805
hsa-miR-107	0.914057	0.603072	0.918495	3.67022	7.21433	14.4234	6.53294	8.93375	6.61278	6.09926	157.993	9.27848	150.019
hsa-miR-10a-3p	1.14672	0.815179	1	2.41279	22.5228	11.8272	0.362941	0.36714	0.453818	9.9113	2.08046	13.8417	0.907636
hsa-miR-10a-5p	2.27866	0.101792	0.436384	1.64077	2.46343	2.01928	342.979	70.7357	87.3924	2.28722	149.304	2.12949	66.5168
hsa-miR-10b-3p	2.14614	0.079678	0.400988	198.177	289.629	147.407	7.9847	1.2238	1.42629	58.9596	4.52807	204.583	6.48311
hsa-miR-10b-5p	2.50949	0.158574	0.502875	2.56816	7.03837	4.32702	441.699	50.7878	96.0149	0.508272	170.476	5.93214	117.474
hsa-miR-11400	2.35991	0.33099	0.722178	167.43	369.69	210.87	3.26647	6.36377	3.43605	43.9655	2.81474	262.383	1.68561
hsa-miR-1180-3p	5.26021	0.0781121	0.397427	5.19497	3.16727	2.88468	1.45176	0.856661	1.0373	7.11581	2.81474	2.89002	4.14919
hsa-miR-12136	0.142126	1	1	71.4806	14.0767	21.9236	46.0935	149.304	66.5168	43.4573	12.1156	33.007	7.58524
hsa-miR-122-5p	0.347145	0.962847	1	0.499365	1.93555	2.01928	0	0.856661	0.972467	1.77895	20.4375	1.06474	10.6323
hsa-miR-1226-3p	2.21999	0.110063	0.45909	2054.03	2207.76	2209.38	6553.26	322.105	1329.1	1801.32	13.3394	3342.08	5.57548
hsa-miR-124-3p	0.450167	0.220128	0.601506	1.07007	0.351918	0.865404	1.08882	1.8357	0.972467	1.52482	0	2.12949	0.0648311
hsa-miR-1246	0.813249	0.130691	0.476455	2.35415	2.63939	0.576936	1.8147	0.856661	0.518649	0	86.8899	6.69267	49.531
hsa-miR-1247-5p	0.309078	0.268073	0.654766	2.71084	7.03837	18.7504	10.8882	0.979041	0.129662	10.1654	8.81137	6.84478	4.47335
hsa-miR-1249-3p	0.303587	0.180457	0.546016	0.214014	0.351918	0.576936	54.0782	2.69236	1.36145	0	11.1366	3.80265	8.10389
hsa-miR-1255b-5p	3.67643	0.0196635	0.184586	0.499365	0.527878	0.576936	3.62941	0.12238	0	1.52482	77443.6	1.52106	70292.6
hsa-miR-125a-3p	1.28151	0.123122	0.472461	0.998731	0.527878	0	1.08882	0.36714	0	0	15.0528	0.608425	9.14119
hsa-miR-125a-5p	0.531375	0.0921065	0.426453	1.41406	1.58363	1.73081	3.62941	1.2238	0.453818	20.8392	0.36714	5.93214	0.453818
hsa-miR-125b-5p	0.645178	0.888383	1	2.14014	5.27878	2.30774	1.8147	19.4584	17.8286	1.27068	5206.66	0.304212	4636.92
hsa-miR-126-3p	5.08534	0.00829354	0.122144	191.043	389.398	190.1	6.89588	1.8357	1.29662	234.313	7.09805	736.042	2.9174
hsa-miR-126-5p	7.54783	0.33973	0.722178	202.6	210.623	149.426	615.548	156.524	80.9741	190.348	4782.13	383.764	3756.32
hsa-miR-1260b	2.05805	0.037835	0.268232	1559.42	5207.34	3656.62	647.124	179.654	65.0256	1059.49	14.6856	4342.17	5.44582
hsa-miR-1261	13.4922	0.108524	0.456789	170.67	1184.38	1017.71	5065.2	2088.54	2259.11	471.168	13.0947	2005.22	3.76021
hsa-miR-127-3p	0.668454	0.0772809	0.397427	1.34653	2.63939	2.01928	1318.2	310.478	923.714	6.3534	2.08046	9.73479	1.0373
hsa-miR-1270	11.247	0.754387	0.997946	2.9835	5.27878	16.1542	1.8147	3.79379	1.68561	3.30377	25.5775	3.49844	31.8969
hsa-miR-1271-5p	115.141	1	1	0.986037	7.39029	2.01928	1.45176	4.85666	1.36145	7.62408	23.3746	9.12637	8.55771
hsa-miR-1273h-3p	9.84469	0.815179	1	2.78218	1.05576	0.288468	16.3323	23.3746	8.55771	0.762408	55.4382	3.19423	45.5115
hsa-miR-1275	43.8027	0.000960808	0.0353793	1.14141	0.879796	0	0.725882	5.99663	4.992	0.254136	3.42664	1.06474	1.81527
hsa-miR-1277-5p	8.34303	1	1	4.77964	2.28747	2.01928	0	3.36714	0.972467	1.52482	3.18188	3.19423	0.648311
hsa-miR-128-3p	2.16112	0.364224	0.7364	0.428027	0.527878	0	0.362941	1.71332	1.29662	3.5579	19.4584	3.65055	17.8286
hsa-miR-1284	122.274	0.388828	0.749569	29.8906	11.6133	15.2888	5.80706	4.28331	1.29662	2.7955	67.1867	30.2691	47.1971
hsa-miR-1285-3p	11.2345	0.630215	0.923449	323.375	210.447	140.195	1.08882	1.71332	0.388987	103.179	3.30426	265.273	2.46358
hsa-miR-1287-5p	3.67048	0.386823	0.749569	1.21274	2.11151	2.88468	1.08882	5.12238	0.58348	1.01654	89.5823	2.5858	100.877
hsa-miR-129-5p	0.254723	1	1	8.13252	1.58363	2.01928	9.07352	4.52807	6.48311	0.762408	6.60853	1.52106	9.91916
hsa-miR-1290	0.454671	0.142391	0.494494	12.2701	2.99131	4.90395	1.8147	1.10142	0.518649	1.77895	17.5004	5.0195	12.7717
hsa-miR-1292-5p	4.58088	0.182791	0.546016	0.35669	2.11151	0.576936	229.016	167.906	254.203	0	480.342	1.52106	876.776
hsa-miR-1293	0.452945	0.502159	0.833332	9.20259	31.8486	21.0582	1.08882	1.2238	2.65808	23.6346	749.211	19.9259	1112.24
hsa-miR-1294	3.66924	0.181297	0.546016	5.49302	0.703837	0	1.45176	5.26235	4.86234	1.27068	0.36714	4.56318	0.0648311
hsa-miR-1296-5p	486.098	1	1	0.642041	0.351918	2.59621	11.9771	17.5004	12.7717	2.03309	50.1759	0.304212	31.8321
hsa-miR-1299	407.626	0.746328	0.995821	22.7568	3.16727	6.63476	68.9588	10.2799	4.53818	20.0767	1.46856	7.60531	0.259325
hsa-miR-1301-3p	0.624575	0.0704091	0.390323	4.85098	4.04706	2.30774	1.8147	11.1366	8.10389	3.5579	7.46519	4.56318	23.4689
hsa-miR-1303	36.669	0.687866	0.97772	4.06626	17.7719	0	0	6.12238	0.0648311	1.27068	1.59094	1.97738	2.98223
hsa-miR-1304-3p	12.9239	1	1	12.1988	7.91816	5.48089	2.17765	21.5389	18.9955	4.57445	5.99663	10.3432	4.992
hsa-miR-1306-5p	0.257228	1.31105e-06	0.000607018	0.35669	0.703837	0.865404	3.62941	0.856661	1.10213	1.01654	35.3679	2.28159	7.19626
hsa-miR-1307-3p	4.88133	0.278224	0.664009	6.27774	4.7509	4.03855	5.08117	7.24476	0.129662	3.5579	13.0947	5.47582	47.975
hsa-miR-1307-5p	60.5783	0.00565364	0.100168	12.1274	11.7893	18.1735	10.5253	10.0352	7.06659	121.985	1.59094	67.6872	0.777974
hsa-miR-130a-3p	9.1496	0.00419632	0.0995417	59.3531	16.3642	19.9043	1.08882	0.856661	1.42629	34.5625	0.24476	33.4634	0
hsa-miR-130b-3p	4.85074	0.0940154	0.426756	29.4626	32.7284	19.0389	1.8147	0.856661	2.65808	2.28722	3.6714	7.3011	2.46358
hsa-miR-130b-5p	1.46517	0.791099	1	218.08	132.849	75.5786	26.1317	17.8675	2.9174	37.8663	2.32522	81.0726	1.0373
hsa-miR-132-3p	3.29134	0.866469	1	77.473	36.0716	40.097	33.7535	76.61	37.991	24.1429	12.8499	22.0554	3.43605
hsa-miR-132-5p	1.61169	0.388828	0.749569	3.49556	2.11151	3.17315	47.9082	15.4199	20.8756	0	0.856661	1.97738	2.65808
hsa-miR-133a-3p	1406.36	0.0982472	0.433223	34.5275	24.6343	16.1542	96.5423	71.5924	162.856	5.84513	10.2799	24.6412	4.86234
hsa-miR-134-5p	3.10892	0.62809	0.923449	1.92612	2.28747	0.288468	27.9465	34.756	68.1375	2.54136	136.209	2.28159	137.248
hsa-miR-1343-3p	1.55231	0.0659975	0.386795	14.0536	3.34322	2.01928	2.54059	3.54902	1.29662	0	9.66803	4.10687	19.9032
hsa-miR-135a-5p	0.542779	0.774942	1	40.0206	46.9811	23.6544	48.2711	7.34281	20.2273	22.8722	0.36714	22.968	0.129662
hsa-miR-136-3p	0.617381	0.737696	0.988046	1.85479	0.703837	0.576936	2.54059	1.34618	0.972467	1.27068	11.3814	2.12949	5.25132
hsa-miR-136-5p	1.32402	0.425237	0.781289	0.642041	2.28747	0	1.8147	3.30426	3.24156	1.01654	1.8357	3.19423	6.67761
hsa-miR-137-3p	0.428873	0.049211	0.312119	2.49683	1.58363	1.44234	28.3094	72.2043	40.3898	0.508272	588.404	2.12949	494.856
hsa-miR-138-5p	0.154997	0.0749331	0.39425	2.21147	0.351918	0.576936	1.08882	1.34618	0.777974	1.52482	25.2103	1.82527	11.6048
hsa-miR-139-3p	1.70054	0.0862889	0.41859	2.14014	1.75959	0	4.71823	2.73428	0.518649	0.254136	28.0251	8.21373	28.396
hsa-miR-139-5p	1.1474	0.518894	0.845943	1.28408	1.58363	0	2.17765	0.856661	1.55595	0	0.12238	5.78003	0.0648311
hsa-miR-140-3p	13.4171	0.22865	0.601506	17.8345	9.5018	13.8465	1.08882	2.69236	1.10213	20.8392	3.30426	31.486	5.25132
hsa-miR-140-5p	9.39002	0.831439	1	4.92232	10.5576	9.23097	9.79941	2.56998	0	2.03309	2.69236	12.7769	0.453818
hsa-miR-141-3p	10.9736	0.62643	0.923449	182.34	55.955	36.6354	8.71058	0.611901	0.259325	37.358	1.8357	46.0882	2.0746
hsa-miR-142-3p	1.00027	0.0461946	0.309617	91.8119	25.1622	38.9432	33.7535	13.829	6.61278	22.8722	1.71332	52.3245	0.324156
hsa-miR-142-5p	8.32481	0.55095	0.864712	10.558	10.7335	9.51944	15.2435	1.2238	2.85257	1.01654	2.4476	10.7995	1.49112
hsa-miR-143-3p	8.14131	0.488232	0.813134	1193.77	2962.62	3295.75	59.5223	109.775	201.819	1393.43	18.1123	1665.26	10.2433
hsa-miR-143-5p	3.16269	0.630324	0.923449	293.627	239.129	300.295	55.8929	37.0812	19.579	48.7941	63.3929	312.274	48.2344
hsa-miR-144-3p	7.15599	0.332671	0.722178	863.26	327.284	375.585	27.2206	8.46856	7.52041	206.867	826.923	467.879	2719.8
hsa-miR-144-5p	0.575125	0.0519889	0.325282	14.3389	3.8711	3.75008	1362.12	749.211	1112.24	3.81204	8.93375	4.56318	6.61278
hsa-miR-145-3p	2.3243	0.0777259	0.397427	373.454	158.011	331.161	195.988	61.6796	227.687	110.803	0.856661	225.573	0.842805
hsa-miR-145-5p	5.85731	0.0850497	0.41859	48.3671	26.042	40.9624	418.471	136.209	137.248	171.034	12.9723	19.9259	10.0488
hsa-miR-146a-5p	6.01418	0.975638	1	2.78218	4.22302	4.32702	10.5253	8.32185	1.94493	0.254136	5.13997	1.36896	3.50088
hsa-miR-146b-3p	3.26189	0.145593	0.494494	40.5199	76.0144	44.4241	189.092	226.526	396.831	7.62408	0.611901	40.156	0.0648311
hsa-miR-146b-5p	3.54172	0.151725	0.499901	3462.03	1945.76	1036.47	9.07352	35.8574	55.0416	916.669	0.611901	2328.59	0.0648311
hsa-miR-148a-3p	2.39205	0.153045	0.499901	2.35415	1.93555	0.865404	3.26647	4.85666	0.842805	3.81204	37.5707	2.5858	9.40052
hsa-miR-148a-5p	571.703	0.113197	0.463809	36.311	22.6987	15.2888	82.7505	27.4132	21.135	9.9113	2.69236	31.3339	3.56571
hsa-miR-148b-3p	3.55379	0.722207	0.984199	429.968	1447.79	3077.38	1602.02	1580.66	1082.49	1171.31	33.6545	1041.47	7.19626
hsa-miR-150-3p	0.793072	0.206436	0.598122	5.70703	5.80665	5.48089	6.89588	3.6714	2.46358	1.27068	1.59094	1.21685	10.4378
hsa-miR-150-5p	0.260418	0.00654188	0.108175	785.787	410.689	498.761	24.317	19.7032	12.7717	377.138	1.59094	444.91	1.62078
hsa-miR-151a-3p	12.4691	0.89959	1	3.21021	10.5576	23.6544	2216.48	821.66	1134.67	5.84513	4013.58	24.7933	4635.36
hsa-miR-151a-5p	5.68127	0.475384	0.803294	59.4958	653.688	469.914	6.53294	4.40569	2.13943	344.1	0.24476	1714.84	0.713143
hsa-miR-152-3p	3.87144	0.0747592	0.39425	1337.01	427.581	190.677	429.722	493.314	340.299	196.193	0.734281	553.362	1.36145
hsa-miR-154-5p	1.32918	0.357001	0.733234	35.2409	14.0767	15.5773	20.6876	25.6998	5.8348	10.4196	0.12238	17.7964	0.0648311
hsa-miR-155-5p	1.09282	0.832204	1	97.8043	73.375	52.2127	571.632	589.138	133.293	28.9715	0.12238	53.5414	0.0648311
hsa-miR-15a-5p	5.04664	0.461881	0.792041	2.85352	2.11151	1.73081	645.309	421.844	660.435	1.52482	143.552	1.21685	417.902
hsa-miR-15b-3p	4.55017	0.359519	0.733291	31.246	69.152	61.4437	14.8806	11.0142	33.9067	30.4963	0.24476	58.713	0.194493
hsa-miR-15b-5p	4.79095	0.763086	1	1905.86	760.848	892.808	117.23	37.3259	41.8161	798.749	13.5842	799.47	7.9094
hsa-miR-16-1-3p	3.51197	1	1	35.8116	16.8921	26.8275	3.62941	9.95808	2.0746	16.2647	2.69236	32.7028	1.75044
hsa-miR-16-2-3p	1.46164	0.127839	0.473515	1413.2	514.505	465.876	45.3676	9.66803	19.9032	635.848	73.5505	623.179	171.089
hsa-miR-16-5p	8.41954	0.846676	1	4.20894	0.175959	0.288468	710.638	738.809	2587.02	0.508272	17408.9	0.608425	10565.9
hsa-miR-17-3p	1.39993	0.0383677	0.268232	3.13887	2.28747	0.288468	11.6141	40.2631	54.0692	7.87822	1.2238	1.36896	0.453818
hsa-miR-17-5p	6.87794	0.702827	0.984199	67492.5	65331.9	79682.3	402.139	486.828	1526.45	40951.5	1.59094	88334.4	0.324156
hsa-miR-181a-2-3p	6.7609	0.430259	0.784291	10.344	1.23171	2.59621	0.362941	2.69236	3.9547	32.7835	206.945	2.4337	194.947
hsa-miR-181a-3p	2.49249	1	1	104.938	38.3591	56.8282	0.725882	1.95808	4.01953	54.6392	15.0528	59.3214	16.0781
hsa-miR-181a-5p	4.30265	1	1	33.8855	11.0854	8.0771	58572.5	48942.6	243308	17.2812	0.24476	15.3627	0
hsa-miR-181b-5p	2.38726	0.694837	0.980814	14.2676	8.44604	6.34629	0	8.79379	3.76021	2.03309	32.5531	7.60531	25.2841
hsa-miR-181c-3p	3.12156	0.388828	0.749569	596.67	345.408	272.314	26.1317	55.9277	93.9403	303.947	130.947	210.059	18.801
hsa-miR-181c-5p	1.86228	1	1	67.6997	59.4742	50.7704	24.68	32.5531	25.2841	30.4963	120.789	34.5281	99.5806
hsa-miR-181d-5p	2.05293	1	1	2.99619	2.28747	0.288468	9.07352	7.38473	4.73267	2.03309	8.19947	2.4337	9.20602
hsa-miR-182-5p	3.77587	0.949091	1	1.78345	1.23171	2.01928	378.184	310.234	208.238	2.54136	73.1833	0.912637	175.628
hsa-miR-183-5p	4.66551	0.771465	1	3.92358	5.10282	4.90395	56.9817	35.6126	23.2744	7.36994	76.61	3.65055	37.991
hsa-miR-184	0.391788	0.00763609	0.121914	329.296	134.081	276.352	2.54059	2.20284	1.42629	315.383	12493.9	98.5648	27816.6
hsa-miR-1843	6.6084	1	1	182.34	58.0665	99.5214	1.45176	7.85666	0.713143	132.913	1.8357	47.9134	0.972467
hsa-miR-185-3p	9.78645	0.538938	0.86342	0.927393	5.45473	11.5387	4.35529	3.0595	0.907636	8.89476	44.424	3.19423	26.5808
hsa-miR-185-5p	10.4228	0.576414	0.894823	4.77964	2.11151	0	128.118	185.651	429.506	1.01654	527.581	2.5858	506.072
hsa-miR-186-3p	286.352	0.22757	0.601506	53.7174	9.5018	7.78863	0	1.46856	1.0373	14.7399	1.46856	19.9259	2.20426
hsa-miR-186-5p	10.72	0.964415	1	4691.11	808.181	674.438	41.3753	63.5153	224.575	1089.48	327.856	1404.24	178.48
hsa-miR-188-5p	236.415	1	1	2.85352	1.40767	2.59621	1.8147	4.10142	1.10213	1.27068	67.0643	0.912637	70.2121
hsa-miR-18a-3p	2.97164	0.0234274	0.208594	628.416	173.848	135.868	7.9847	3.30426	5.25132	107.5	29.616	197.282	58.8018
hsa-miR-18a-5p	5.55141	0.525853	0.852246	2.35415	1.05576	0.576936	21.4135	62.2915	21.135	0	0.611901	0.760531	0.259325
hsa-miR-1908-5p	4.61769	0.0301108	0.235783	12.0561	4.7509	7.50017	1557.74	4013.58	4635.36	16.0106	1.71332	12.4727	3.76021
hsa-miR-190a-5p	0.471135	0.781905	1	27.8218	13.1969	26.539	3.26647	7.85666	2.26909	7.87822	1.71332	13.6896	0.388987
hsa-miR-190b-5p	2.13287	0.351398	0.727285	14.3389	3.16727	3.75008	447.869	480.342	876.776	23.3805	2.93712	7.75741	2.85257
hsa-miR-191-3p	29.9248	0.711441	0.984199	11.5567	32.5524	75.2901	1.8147	0.734281	1.55595	77.7656	84.3199	39.2434	178.415
hsa-miR-191-5p	2.39614	0.248697	0.626009	11.6994	8.622	11.5387	3.26647	37.5707	9.40052	19.0602	2.93712	13.3853	3.04706
hsa-miR-192-5p	3.34009	0.471953	0.800419	7.41914	3.51918	7.2117	7.9847	9.66803	26.3214	2.03309	79.9142	11.1037	209.016
hsa-miR-193a-5p	1.62929	0.75261	0.997946	1581.99	1388.32	786.652	7.9847	14.6856	6.35345	1362.17	3.79379	1212.74	2.9174
hsa-miR-193b-3p	0.176033	0.289832	0.670961	249.112	73.375	90.8674	21.0506	64.372	29.2388	131.134	1.8357	113.015	6.67761
hsa-miR-193b-5p	0.727552	0.433794	0.784794	73.7634	169.273	141.638	8.71058	21.1718	9.65984	117.411	2.08046	124.119	2.33392
hsa-miR-194-5p	4.39054	0.420088	0.781289	0.285352	1.40767	0.865404	6.53294	6.97567	3.37122	0	6764.32	0.152106	11785.1
hsa-miR-195-5p	1.85934	0.602767	0.918495	4.85098	5.27878	8.36557	850.371	1527.3	1853.33	4.06618	5.62949	9.27848	2.26909
hsa-miR-196a-5p	0.801213	0.0315736	0.235783	303.4	112.262	130.676	229.016	206.945	194.947	83.3566	39.6512	132.789	98.673
hsa-miR-196b-5p	9.20885	0.829193	1	12.4128	16.3642	8.94251	382.54	154.444	41.1678	9.65717	186.018	16.8838	328.046
hsa-miR-197-3p	0.784477	0.0131468	0.160184	0.570703	2.99131	2.30774	38.8347	3.79379	2.9174	0	132.66	1.82527	52.5132
hsa-miR-197-5p	165.077	0.72699	0.984199	118.564	31.4967	43.2702	336.446	143.552	417.902	88.9476	52.0116	45.0234	6.0293
hsa-miR-1976	0.89964	0.2193	0.601506	31.9594	72.3192	102.406	13.7918	3.71332	3.76021	70.9039	780.908	244.891	685.46
hsa-miR-199a-3p|hsa-miR-199b-3p	5.16314	0.62293	0.923449	1.64077	1.40767	0.865404	3.62941	0.24476	1.10213	2.7955	0.856661	1.97738	1.10213
hsa-miR-199a-5p	18.1576	0.130212	0.476455	0.642041	0.351918	0.865404	22.1394	101.331	76.0469	1.52482	0.489521	1.06474	0.518649
hsa-miR-199b-5p	0.606346	0.43448	0.784794	2213.12	1153.06	1429.36	86.7429	43.9345	16.143	686.675	0.734281	1431.78	0.518649
hsa-miR-19a-3p	6.0059	0.941343	1	78.0437	21.2911	18.7504	0.725882	2.81474	1.42629	5.08272	10.2799	24.9454	9.01153
hsa-miR-19b-3p	8.65361	0.735774	0.988046	6.06372	19.8834	11.2502	0.362941	6.95808	0.907636	13.9775	5.26235	17.188	3.76021
hsa-miR-200a-3p	2.30194	0.915343	1	540.955	136.544	201.351	1263.4	588.404	494.856	116.394	2.81474	186.482	0.648311
hsa-miR-200b-3p	2.68684	1	1	2694.86	565.005	679.919	32.3017	19.4584	18.8659	490.228	329.447	715.659	183.342
hsa-miR-200c-3p	2.59119	0.308142	0.699362	3.85225	5.45473	5.19242	10.8882	11.1366	4.92717	0	62.2915	5.62793	21.135
hsa-miR-203a-3p	0.351376	0.00490611	0.100168	5.77837	5.10282	2.88468	98.357	163.01	369.602	2.54136	2.08046	7.75741	1.10213
hsa-miR-204-3p	1.19359	0.344711	0.722178	11.1287	6.15857	6.34629	472.186	1228.33	2260.4	7.36994	1.34618	13.9938	0.453818
hsa-miR-205-5p	1.32847	0.0184816	0.184586	39.5925	386.406	762.709	9.43647	1.2238	2.65808	264.301	425.516	221.467	1007.41
hsa-miR-206	1.834	1	1	0.570703	0.703837	0.865404	8.71058	7.20284	2.85257	0	2.69236	1.52106	3.11189
hsa-miR-20a-5p	7.44909	0.665392	0.956759	25.325	61.4098	107.887	0.362941	5.12238	0.0648311	22.8722	1.8357	68.1436	1.0373
hsa-miR-20b-5p	3.74277	0.157323	0.50235	10.0586	5.98261	6.05783	13.4288	7.8357	5.44582	10.9278	38.0602	13.9938	29.174
hsa-miR-21-3p	12.3602	0.0737838	0.39425	967.342	230.682	435.298	380.362	130.947	18.801	275.992	2.93712	586.826	1.81527
hsa-miR-21-5p	4.27849	0.24178	0.621592	248.827	42.7581	112.502	2.54059	1.2238	0.259325	136.217	1.8357	127.009	1.36145
hsa-miR-210-3p	9.81835	0.974942	1	14.8383	6.51049	4.03855	137.192	23.0075	8.62254	1.52482	1.95808	3.49844	2.26909
hsa-miR-2110	6.55648	0.215787	0.601506	406.943	3630.04	4604.24	6.89588	6.24139	0.388987	2569.57	12.238	3690.86	31.7024
hsa-miR-214-3p	4.45493	0.437216	0.784794	70.2678	12.4931	14.7119	167.316	216.368	649.997	25.9219	1.10142	15.819	0.324156
hsa-miR-215-5p	0.369525	0.00895356	0.122144	57.855	14.9565	12.1157	40.6494	106.348	186.13	25.6677	1.2238	30.117	1.10213
hsa-miR-218-5p	0.141606	0.0262342	0.225709	1.28027	3.8711	0	6.17	9.18188	8.55771	2.7955	61.6796	4.56318	227.687
hsa-miR-219a-2-3p	0.102316	0.334762	0.722178	0.282813	11.7893	12.4041	5572.6	1916.23	5306.56	2.54136	2.32522	6.08425	1.23179
hsa-miR-22-3p	12.8907	0.145762	0.494494	1.71211	2.63939	0.865404	108.882	55.4382	45.5115	2.54136	2.56998	6.84478	12.1883
hsa-miR-22-5p	9.4247	0.437315	0.784794	0.35669	0.527878	0	46.4564	86.8899	49.531	0	1687.01	1.21685	6216.27
hsa-miR-221-3p	2.52912	0.781694	1	1088.63	530.869	514.05	0	4.24476	0.194493	324.532	1.95808	447.496	0.907636
hsa-miR-222-3p	3.70974	0.470376	0.800419	18.0485	4.7509	9.23097	4.71823	1.71332	0.713143	0.762408	1.2238	9.12637	0.388987
hsa-miR-223-3p	6.26693	0.959387	1	536.618	893.169	805.979	7.62176	2.93712	3.04706	1063.05	2143.12	983.062	6600.91
hsa-miR-223-5p	1.78203	0.41391	0.781289	87.5316	90.2671	79.0402	0	0	0.0648311	38.1204	7.46519	62.8198	4.53818
hsa-miR-224-5p	7.61714	0.613626	0.923449	2411.51	2466.77	2002.83	7.62176	1.8357	0.777974	808.661	21.906	3245.34	11.9289
hsa-miR-2355-3p	6.82535	0.047479	0.309617	4.77329	31.3207	42.9817	1198.79	1354.01	1470.63	12.9609	0.856661	22.8159	1.0373
hsa-miR-23a-3p	2.8375	0.121866	0.472461	165.219	46.6292	18.4619	3.26647	10.2799	6.93693	41.9324	109.775	33.6155	201.819
hsa-miR-23a-5p	0.973368	1	1	0.998731	0.703837	0	1347.24	1411.78	649.803	0	7.46519	1.21685	15.6891
hsa-miR-23b-3p	3.47019	0.632714	0.923449	6.56309	7.56625	10.0964	1.08882	0.611901	0.518649	1.77895	1.71332	5.78003	1.29662
hsa-miR-23b-5p	2.50245	0.505129	0.833385	783.576	1720.88	1509.84	88.1947	99.8622	62.3027	367.481	3.30426	1100.94	3.24156
hsa-miR-24-3p	12.7844	0.153317	0.499901	0.927393	2.28747	3.17315	1838.66	2043.87	869.775	0	2.69236	2.4337	1.36145
hsa-miR-25-3p	8.94714	0.351861	0.727285	575.483	399.955	151.734	21.0506	13.5842	7.9094	189.331	2.08046	481.264	1.49112
hsa-miR-25-5p	4.23806	0.090033	0.423557	2.99619	2.11151	2.01928	42.4641	13.3394	5.57548	2.03309	1.2238	5.78003	2.0746
hsa-miR-26a-2-3p	1.39177	1	1	319.038	925.193	946.752	0	120.203	1.29662	166.967	15.6647	892.103	67.2947
hsa-miR-26a-5p	2.92776	0.14757	0.494494	1296.41	1450.26	2353.61	7.25882	2.93712	2.85257	3150.78	1.10142	4197.22	2.85257
hsa-miR-26b-3p	357.69	0.455928	0.787666	2.12998	4.22302	1.73081	1767.89	426.128	466.655	14.2316	2.08046	4.8674	1.8801
hsa-miR-26b-5p	2.87468	0.83164	1	0.998731	1.05576	1.15387	5.80706	1.8357	4.71314	1.77895	1354.01	1.36896	1470.63
hsa-miR-27a-3p	6.97652	0.00851157	0.122144	1240.99	1603.69	1262.91	407.583	139.024	187.492	705.227	2.69236	1157.22	1.29662
hsa-miR-27a-5p	1.78548	0.32592	0.722014	3.5669	4.04706	1.73081	4.35529	2.93712	1.49112	0.762408	0.856661	1.82527	3.11189
hsa-miR-27b-3p	4.21736	0.306328	0.698669	594.53	423.534	765.305	799.559	527.581	506.072	782.739	310.478	596.56	923.714
hsa-miR-28-3p	2.03953	0.193043	0.569292	365.749	791.464	637.514	2910.42	6764.32	11785.1	55.4016	39.6512	348.323	17.8286
hsa-miR-28-5p	8.67537	0.333927	0.722178	1.28408	3.8711	7.78863	8.34764	20.4375	10.6323	1.27068	2.32522	3.34634	6.80727
hsa-miR-296-5p	0.592408	7.64825e-06	0.00177057	453.21	351.039	252.121	0.725882	0.856661	5.45382	95.0469	9.66803	356.081	65.5443
hsa-miR-29a-3p	3.01985	0.156382	0.50235	101.086	66.8645	35.77	0.362941	0.489521	6.71314	84.6273	0.734281	75.2925	0.518649
hsa-miR-29a-5p	1.76439	1	1	1.27774	4.22302	1.44234	1023.13	425.516	1007.41	0	0.24476	1.97738	0.129662
hsa-miR-29b-2-5p	2.21999	0.289832	0.670961	1.2064	1.93555	2.88468	1.8147	2.32522	4.08436	39.6452	1.95808	9.73479	0.324156
hsa-miR-29b-3p	2.40145	0.951544	1	566.994	878.74	517.511	249.34	403.855	560.141	96.0634	489.398	538.152	422.634
hsa-miR-29c-3p	10.7431	0.00307422	0.0837272	0.428027	0.175959	0.865404	664.182	73.1833	175.628	1.01654	488.052	1.06474	737.26
hsa-miR-29c-5p	3.20004	0.277403	0.664009	1.07007	0.703837	0.865404	3.26647	2.69236	8.29662	2.28722	9.05613	2.28159	8.9467
hsa-miR-301a-3p	1.26918	0.243105	0.621592	105.865	55.7791	66.3476	616.637	85.4214	179.582	39.6452	1.71332	87.0047	2.39875
hsa-miR-3065-5p	1.19627	0.791099	1	507.727	697.854	821.557	79.1211	58.0082	39.0283	184.503	35.6126	441.716	23.2744
hsa-miR-30a-3p	1.47046	0.260375	0.648139	12.9835	8.09412	5.48089	0.725882	1.95808	2.26909	1.27068	0.12238	4.10687	0.58348
hsa-miR-30a-5p	4.01575	0.0335658	0.246682	21.4727	12.1412	21.3466	5.80706	23.1299	8.7522	30.2422	14.6856	17.3401	6.35345
hsa-miR-30b-5p	2.07342	0.813364	1	1.71211	0.879796	1.73081	693.217	173.046	406.102	0.254136	2.20284	1.36896	1.29662
hsa-miR-30c-1-3p	3.20115	0.22757	0.601506	4.20894	5.27878	2.30774	1.45176	0.611901	2.19449	1.77895	3.6714	5.0195	0.907636
hsa-miR-30c-5p	2.14702	0.958331	1	124.413	203.057	131.253	1.08882	2.08046	2.33392	16.5188	3.0595	130.507	0.907636
hsa-miR-30d-3p	322.021	0.425237	0.781289	20.7593	20.7632	18.4619	50.8117	37.9379	87.9759	21.0933	1.2238	19.6217	0
hsa-miR-30d-5p	6.22056	0.956227	1	0.784717	2.46343	2.01928	646.761	339.605	1305.44	0.762408	426.128	1.06474	466.655
hsa-miR-30e-3p	1.61896	0.915485	1	83.394	60.354	49.9049	11.9771	15.0528	16.0781	55.9099	6.36377	57.8003	9.72467
hsa-miR-30e-5p	7.59334	0.117073	0.471347	3.21021	1.40767	4.03855	7.25882	7.46519	15.6891	0.762408	0.734281	2.4337	0.648311
hsa-miR-31-5p	0.109602	0.15555	0.50235	1073.95	2156.56	1596.96	0	0.36714	2.97247	1050.09	5.26235	1766.56	1.29662
hsa-miR-3127-5p	5.21261	1	1	16.9784	18.8276	12.9811	3.62941	5.6119	4.8428	21.3474	1.2238	16.8838	2.00977
hsa-miR-3143	2.15858	0.72699	0.984199	188.703	642.955	843.48	12.34	1.8357	2.00977	206.358	173.046	516.857	406.102
hsa-miR-3158-3p	10.2224	0.762428	1	0.35669	2.11151	0	321.203	19.7032	76.3063	2.54136	35.3679	0.608425	35.2033
hsa-miR-3168	0.168814	0.376332	0.749569	1.28408	0.527878	0.576936	17.0582	9.91279	26.127	0.254136	13.3394	1.67317	13.2256
hsa-miR-3173-5p	0.368891	0.00395389	0.0995417	2.0688	1.58363	1.73081	0	1.34618	5.45382	0.762408	0.36714	0.912637	0.972467
hsa-miR-3175	1.63347	0.453766	0.787666	0.713379	0.175959	0.288468	32.3017	51.6444	112.288	0.762408	385.742	0.152106	288.499
hsa-miR-3178	0.304279	0.375489	0.749569	12.2701	0.879796	3.46162	3.26647	1.59094	1.42629	4.82858	28.5146	3.19423	25.2841
hsa-miR-3182	0.365474	0.526442	0.852246	1.64077	5.10282	9.51944	2068.76	1687.01	6216.27	12.9609	3.54902	4.10687	10.373
hsa-miR-3187-3p	336.288	1	1	0.784717	0.703837	2.01928	13.0659	9.05613	8.9467	12.7068	0.24476	4.41108	0.58348
hsa-miR-32-5p	6.48273	0.0473018	0.309617	0.784717	3.8711	2.01928	725.519	318.433	1491.83	0.762408	86.4004	0.912637	100.683
hsa-miR-3200-3p	17.2814	1	1	0.428027	0.527878	0.288468	2.17765	0.856661	4.45382	0	1.10142	0.456318	0.58348
hsa-miR-320a-3p	8.52049	0.460694	0.792041	1.21274	2.11151	3.75008	0.362941	1.10142	1.36145	4.57445	1.8357	2.89002	0.777974
hsa-miR-320b	5.06862	0.805049	1	3.35288	1.93555	0	0	0.734281	2.13943	1.27068	20.6822	2.28159	6.15896
hsa-miR-320c	4.46212	0.388654	0.749569	180.77	92.9065	144.234	2.17765	0.611901	4.40852	38.6287	1.95808	89.7426	0.388987
hsa-miR-320d	4.01047	0.0607896	0.360841	4.28027	0.703837	1.73081	1.08882	2.81474	1.68561	1.27068	14.1961	3.19423	10.373
hsa-miR-323a-3p	1.69183	0.173071	0.541432	412.663	1727.04	586.455	0.362941	7.36714	2.12966	933.187	0.856661	1172.89	0.972467
hsa-miR-323b-3p	1.3459	0.269603	0.654766	43.5161	21.8189	12.9811	1.45176	25.2103	11.6048	23.6346	1421.94	23.2722	1885.16
hsa-miR-324-3p	6.95484	0.209278	0.598122	2.35034	4.57494	7.2117	8.34764	4.03855	0.713143	2.54136	0.979041	5.62793	0.129662
hsa-miR-324-5p	5.41719	0.0379424	0.268232	3.85225	6.33453	6.92323	2.17765	3.18188	5.71314	2.7955	4.16093	3.04212	1.36145
hsa-miR-326	21.0169	0.608311	0.920418	2.42549	4.04706	0.865404	1.45176	9.59094	1.36145	2.28722	179.654	3.04212	65.0256
hsa-miR-328-3p	0.914818	0.00524364	0.100168	3.21021	12.4931	4.32702	1.45176	5.62949	2.20426	3.5579	2.69236	4.10687	3.9547
hsa-miR-329-3p	1.01785	1	1	44.8002	18.2998	8.65404	18.8729	7.59094	1.62078	20.0767	0.856661	26.0102	1.42629
hsa-miR-331-3p	0.977079	0.0935278	0.426756	74.9048	20.9391	22.5005	1.08882	5.26235	3.76021	80.307	821.66	40.6123	1134.67
hsa-miR-335-3p	6.59628	0.111623	0.461443	5.20767	3.69514	1.73081	63.5147	36.2245	224.64	0.762408	5.26235	3.95476	1.8801
hsa-miR-335-5p	6.86591	0.0174288	0.182279	55.1442	67.9202	62.5975	1.45176	6.60853	9.91916	112.074	21.5389	144.501	18.9955
hsa-miR-337-5p	5.29919	0.319769	0.715231	1.21274	1.58363	0.865404	0	1.8357	1.0373	1.52482	40.2631	0.760531	54.0692
hsa-miR-338-3p	0.232328	0.0149865	0.173469	2.42295	4.39898	2.59621	3143.43	4782.13	3756.32	10.9278	656.57	3.19423	994.38
hsa-miR-339-3p	12.0024	0.793366	1	1.05737	6.86241	3.46162	2.17765	1.59094	0.648311	0.762408	8.44423	1.52106	2.9174
hsa-miR-339-5p	5.90531	0.453452	0.787666	448.287	403.826	189.523	38.4717	67.1867	47.1971	65.8212	3.18188	154.844	0.713143
hsa-miR-33a-5p	1.20492	0.357907	0.733234	2.56816	3.51918	2.30774	5.80706	8.32185	3.50088	0	2.69236	2.5858	1.10213
hsa-miR-33b-5p	2.30673	1	1	13.5542	19.7074	5.76936	10.8882	2.93712	2.20426	56.1641	2088.54	15.5148	2259.11
hsa-miR-340-5p	12.0046	0.31925	0.715231	114.497	35.7197	23.6544	3.62941	1.95808	2.85257	27.4467	28.2698	28.1396	19.7087
hsa-miR-342-3p	0.369455	0.000971089	0.0353793	257.53	105.048	95.1944	4.35529	5.62949	4.92717	113.091	0.856661	121.381	1.42629
hsa-miR-345-5p	27.5733	0.0978485	0.433223	11.4854	8.622	7.78863	59.8853	50.1759	31.8321	15.5023	9.30089	8.82216	7.84457
hsa-miR-34a-5p	0.774166	0.693167	0.980814	2.21147	0.351918	2.01928	42.827	89.5823	100.877	0	9579.55	1.06474	18009.2
hsa-miR-34c-5p	0.751141	0.344711	0.722178	166.003	100.121	116.541	5.08117	5.26235	1.42629	11.6903	43.9345	108.147	16.143
hsa-miR-3605-3p	1.28627	0.104892	0.445549	85.8195	322.885	229.332	78.0323	112.712	27.6829	227.198	1.8357	877.196	2.0746
hsa-miR-3605-5p	1.37415	1	1	19.9746	24.2824	11.8272	0	0.734281	3.51865	2.28722	0.489521	8.06163	0.194493
hsa-miR-361-3p	1.57518	0.00884529	0.122144	22.6855	10.7335	15.0003	1.45176	7.48952	4.77797	5.33686	0.489521	18.1006	0.194493
hsa-miR-361-5p	4.18673	0.853491	1	0.713379	1.23171	0	3.26647	3.30426	2.98223	0.762408	2043.87	1.97738	869.775
hsa-miR-3611	193.612	0.375489	0.749569	3.06753	3.69514	5.19242	0.362941	2.93712	1.81527	10.1654	19.4584	9.27848	18.8659
hsa-miR-3613-3p	1.4919	0.289832	0.670961	1.64077	1.93555	1.73081	1.8147	0.611901	1.36145	1.52482	1.34618	0.456318	1.16696
hsa-miR-3613-5p	2.21567	0.088596	0.422886	40.1632	31.6727	17.5965	272.932	73.5505	171.089	55.6558	7.58757	52.6287	4.73267
hsa-miR-3615	5.32	0.800427	1	204.526	183.174	182.023	2.90353	1.95808	2.46358	49.5565	104.146	252.648	148.334
hsa-miR-362-5p	2.20018	0.17007	0.535664	1.92612	1.58363	1.15387	22.8653	6.11901	6.93693	0	8.56661	0.304212	5.57548
hsa-miR-363-3p	8.44087	1	1	1.42676	0.527878	0.576936	48.6341	120.789	99.5806	1.52482	0.734281	1.97738	2.9174
hsa-miR-365a-3p|hsa-miR-365b-3p	0.949931	0.509391	0.833385	243.904	106.983	215.197	114.326	251.246	133.552	268.368	1.46856	273.335	0.777974
hsa-miR-3667-5p	279.218	0.146941	0.494494	79.8984	59.8261	40.674	7.25882	2.69236	3.56571	42.1866	28.3922	45.784	30.1465
hsa-miR-3679-5p	9.4048	0.0999838	0.436384	2.77837	1.05576	2.59621	3.26647	1.59094	1.62078	11.182	1.95808	1.97738	0.842805
hsa-miR-3688-3p	7.6911	1	1	577.266	119.828	107.887	137.192	15.6647	67.2947	150.449	5.38473	134.158	4.73267
hsa-miR-369-3p	0.41307	0.312341	0.705434	2.56309	11.4373	9.51944	272.206	310.601	265.03	8.13235	93.7432	16.4275	123.568
hsa-miR-369-5p	1.70369	0.224916	0.601506	2.78218	3.34322	0.865404	17.4212	38.0602	29.174	0	139.024	0.608425	187.492
hsa-miR-370-3p	0.888728	0.138442	0.494031	4.56563	2.63939	4.61549	61.337	8.56661	5.57548	2.28722	72.2043	1.67317	40.3898
hsa-miR-374a-3p	0.625086	0.545186	0.864712	1.56436	0.703837	1.44234	5.80706	0.856661	0	0.254136	2.56998	0.760531	0
hsa-miR-374a-5p	3.56417	0.391461	0.749569	4.42295	4.7509	16.1542	4.71823	7.58757	4.73267	8.13235	403.855	3.80265	560.141
hsa-miR-374b-5p	8.15884	0.253054	0.633318	4.06626	5.10282	1.73081	1.08882	2.56998	3.11189	2.7955	1.46856	3.65055	1.75044
hsa-miR-375-3p	1.4131	0.734006	0.988046	2.56309	7.39029	1.73081	38.1088	63.3929	48.2344	11.182	1.10142	1.52106	5.25132
hsa-miR-376a-3p	1.42556	0.420146	0.781289	1.78345	2.28747	8.65404	181.833	39.6512	98.673	3.04963	53.6025	2.89002	31.8969
hsa-miR-376c-3p	1.36621	0.386755	0.749569	73.9061	62.9934	94.9059	1.08882	1.71332	1.10213	25.9219	6.24139	60.9946	0.388987
hsa-miR-377-3p	293.485	0.428054	0.783355	5.623	13.021	11.2502	0	1.95808	1.16696	6.3534	0.856661	10.4953	0.713143
hsa-miR-378a-3p	11.4461	0.135908	0.491605	4.48159	95.5458	35.4816	36.2941	112.345	255.564	6.3534	1.2238	94.1537	0.259325
hsa-miR-378a-5p	2.36557	0.363453	0.7364	1.77837	3.34322	1.15387	2.54059	4.48952	0.324156	3.30377	1.34618	1.97738	1.55595
hsa-miR-378c	1.01046	0.791099	1	0.49048	3.69514	1.44234	94.3647	157.993	150.019	2.28722	0.12238	2.73791	0.453818
hsa-miR-379-5p	0.490336	0.138713	0.494031	2.92485	2.28747	0.865404	5.08117	10.2799	4.86234	1.01654	0.489521	1.97738	0.713143
hsa-miR-381-3p	3.72833	0.301788	0.695163	316.455	163.466	112.502	126.303	489.398	422.634	51.3355	2.69236	99.4774	1.36145
hsa-miR-382-5p	0.71929	0.00516032	0.100168	1.7771	1.58363	2.01928	14.8806	5.46856	6.61278	2.03309	1580.66	3.65055	1082.49
hsa-miR-3913-5p	3.85245	1	1	1.92612	2.11151	2.30774	2.90353	6.6119	2.39875	0	3.79379	0.304212	1.68561
hsa-miR-3925-5p	0.0677082	1	1	6.42041	5.10282	8.0771	0.362941	8.36714	1.16696	6.86167	1.2238	3.65055	2.85257
hsa-miR-3928-3p	6.76548	1	1	7.13379	3.34322	2.88468	0	3.0595	4.53818	1.52482	4.28331	5.0195	1.55595
hsa-miR-3940-3p	122.274	0.0707407	0.390323	61.3506	62.8174	38.6547	4.71823	1.59094	2.98223	171.288	6.97567	41.8292	2.78774
hsa-miR-3960	0.972132	0.222541	0.601506	2.78218	1.23171	1.44234	3.26647	2.93712	3.76021	1.01654	0.24476	1.21685	1.36145
hsa-miR-409-3p	1.0522	0.000433113	0.0250664	0.0713379	0	0.576936	3.99235	9.30089	7.84457	1.01654	1.8357	0.760531	3.11189
hsa-miR-411-5p	0.356306	1	1	3.28154	1.93555	1.15387	3.26647	7.73428	1.36145	2.28722	3.79379	1.21685	0.777974
hsa-miR-421	4.46987	0.908825	1	1.21274	0	0.576936	39.1976	13.0947	47.975	2.03309	11.1366	2.5858	4.92717
hsa-miR-423-3p	5.25458	0.424185	0.781289	7.83448	13.021	17.0196	3.99235	5.59094	10.4378	94.7927	1.46856	11.8643	1.0373
hsa-miR-423-5p	5.24065	0.714455	0.984199	26.3237	19.3555	7.2117	131.022	51.3997	36.3703	54.3851	1.59094	21.1428	1.42629
hsa-miR-424-3p	6.11627	1	1	0.927393	1.93555	2.88468	2.54059	2.56998	5.12166	1.27068	9.66803	1.67317	26.3214
hsa-miR-424-5p	3.75999	0.00243975	0.075307	52.2193	27.4496	21.3466	2.90353	3.32522	4.40852	20.0767	2.08046	30.5733	0.129662
hsa-miR-425-3p	5.9414	0.529107	0.853578	363.11	193.203	179.716	3.62941	5.46856	3.23179	165.188	81.0157	240.936	60.6171
hsa-miR-425-5p	8.77416	0.713582	0.984199	478.296	5740.49	5980.23	391.25	327.856	178.48	4741.16	21.1718	6917.03	9.65984
hsa-miR-429	1.29539	0.144792	0.494494	0.42295	1.58363	2.88468	5.80706	14.6856	5.44582	3.04963	154.444	3.95476	41.1678
hsa-miR-431-5p	3.70816	0.120331	0.472461	63.6334	92.7305	206.255	3.99235	11.5909	2.97247	14.2316	2.81474	54.454	2.78774
hsa-miR-432-5p	0.878487	0.000743165	0.0344085	42.5174	40.8225	26.539	1.8147	5.13997	7.77974	21.3474	51.3997	28.4439	36.3703
hsa-miR-4429	0.614983	0.0829096	0.412765	1703.14	1414.01	1107.43	3.26647	3.0595	6.48311	802.307	1.2238	1429.04	1.42629
hsa-miR-4433b-3p	585.971	0.758853	1	1.85479	1.23171	1.73081	51.9006	81.0157	60.6171	0.508272	13.829	3.04212	6.61278
hsa-miR-4433b-5p	0.794333	0.000160915	0.0148281	22.1147	14.2527	11.8272	2.54059	5.13997	3.50088	16.2647	1.59094	12.3206	1.62078
hsa-miR-4443	23.8331	0.477574	0.80406	44.3722	27.2737	16.4427	1.8147	3.30426	2.46358	118.682	3.6714	27.6833	1.10213
hsa-miR-4446-3p	4.01047	0.418309	0.781289	0.142676	0.703837	2.01928	1.45176	7.8357	2.0746	0	0.611901	0.608425	4.40852
hsa-miR-4448	1.05927	0.0296324	0.235783	5.84971	3.16727	0	60.2482	63.2705	22.0426	1.77895	0.36714	2.12949	0.907636
hsa-miR-4454	0.601215	0.582035	0.894823	27.2511	30.4409	13.8465	14.5176	44.424	26.5808	91.489	0.734281	62.5156	0.842805
hsa-miR-4488	3.0822	0.881278	1	17.2638	8.27008	28.5583	1.45176	3.10142	0.58348	18.8061	2.56998	7.90952	3.11189
hsa-miR-4497	3.20115	0.388828	0.749569	3.85225	3.34322	1.73081	32.3017	21.7837	56.8569	4.32031	2.56998	7.60531	2.39875
hsa-miR-4508	1.55652	0.0187877	0.184586	3.28154	1.40767	0.865404	173.849	410.341	100.294	7.11581	1.59094	4.56318	1.36145
hsa-miR-450b-5p	2.24125	0.000414907	0.0250664	0.998731	2.11151	1.44234	5846.98	17408.9	10565.9	4.06618	1.2238	1.06474	1.29662
hsa-miR-4516	4.45576	0.0303364	0.235783	14.2549	14.7806	10.9618	1.45176	2.32522	1.81527	33.8001	738.809	19.6217	2587.02
hsa-miR-451a	5.98044	0.773255	1	0.784717	1.75959	0.865404	85.6541	25.5775	31.8969	1.27068	0.611901	1.52106	0.518649
hsa-miR-454-3p	0.608352	0.869598	1	20.4026	5.98261	2.30774	26.4947	32.7979	22.6261	64.0423	2.32522	9.58269	1.29662
hsa-miR-454-5p	1.79277	1	1	2.42041	26.042	102.983	1470.27	5206.66	4636.92	2.7955	13.4618	13.5374	46.1598
hsa-miR-4685-3p	2.89934	0.268073	0.654766	22.3288	23.2266	14.4234	2.54059	5.12238	0.453818	6.3534	251.246	5.47582	133.552
hsa-miR-4710	5.72256	1	1	209.685	3707.81	2493.52	12.7029	28.2698	19.7087	7301.07	1.2238	3017.94	2.85257
hsa-miR-4714-3p	2.36662	1	1	13.9109	36.7755	84.5211	13.7918	45.2807	34.2308	70.1415	1.34618	39.2434	2.52841
hsa-miR-4732-3p	1.34284	1.96181e-05	0.00302773	3.85225	2.63939	2.88468	2.54059	1.2238	0.388987	2.03309	1.95808	1.82527	1.36145
hsa-miR-4732-5p	8.98796	0.881087	1	2.78218	1.40767	0	4.35529	1.10142	1.68561	4.57445	5.01759	1.21685	2.72291
hsa-miR-4738-3p	0.973368	0.687866	0.97772	0.137598	3.34322	0.865404	33.0276	31.5741	6.61278	0.762408	32.0636	2.89002	27.8126
hsa-miR-4772-3p	0.30234	0.242399	0.621592	1.14141	0.175959	1.15387	7.25882	3.79379	2.20426	1.77895	1527.3	0	1853.33
hsa-miR-4787-5p	36.669	0.453766	0.787666	13.5161	10.3816	12.6926	2.90353	1.59094	1.42629	127.576	2.32522	47.9134	1.81527
hsa-miR-483-3p	0.120995	0.0545335	0.335197	100.729	37.3033	37.5008	10.5253	2.4476	1.49112	46.5069	2.81474	45.1755	1.42629
hsa-miR-483-5p	1.09603	0.342609	0.722178	0.927393	1.23171	0.288468	11.6141	1.73428	0.518649	1.01654	310.601	1.21685	265.03
hsa-miR-484	5.85201	0.119746	0.472461	0.713379	6.86241	0.865404	0	1.2238	0	4.82858	10.7695	7.14899	9.59501
hsa-miR-485-3p	0.446177	7.54626e-05	0.00873479	1.35542	0.879796	0.288468	48.6341	20.6822	6.15896	0	216.368	0.912637	649.997
hsa-miR-485-5p	0.195723	0.0388155	0.268232	0.35669	1.23171	0	7.9847	2.32522	1.0373	2.7955	50.7878	1.06474	96.0149
hsa-miR-486-3p	3.51711	0.00112326	0.0371476	0.856055	3.34322	3.75008	22.1394	76.8547	31.5728	2.54136	48942.6	7.60531	243308
hsa-miR-486-5p	3.25233	0.000993372	0.0353793	29.2485	74.9586	36.347	18.51	3.30426	2.59325	19.3143	1.46856	40.156	1.81527
hsa-miR-487b-3p	1.88391	0.72699	0.984199	945.099	740.26	713.381	27.2206	28.5146	25.2841	893.796	0.734281	1585.4	1.0373
hsa-miR-491-5p	28.4881	1	1	4.56563	2.63939	1.15387	4066.75	12493.9	27816.6	12.7068	20.0703	6.84478	8.62254
hsa-miR-493-3p	2.97341	0.289832	0.670961	0.784717	1.58363	0.576936	11.9771	7.22043	19.3845	2.7955	10.2799	3.34634	6.93693
hsa-miR-493-5p	0.343497	0.0432442	0.294442	90.5278	16.1882	30.5776	1.45176	1.2238	4.01953	114.361	32.7979	85.6358	22.6261
hsa-miR-494-3p	1.04696	0.754387	0.997946	250.059	10607	11603.3	2.90353	1.59094	0.324156	68819.5	3.30426	37245.5	2.46358
hsa-miR-497-5p	1.97757	0.688416	0.97772	1.35542	1.05576	1.15387	0	3.12238	5.96447	0.762408	310.234	1.36896	208.238
hsa-miR-499a-5p	1.56597	0.305204	0.698669	1.06245	2.81535	1.73081	3.62941	7.09805	2.9174	4.06618	21.7837	3.04212	56.8569
hsa-miR-5001-3p	421.894	1	1	2.85352	0.351918	0	7.9847	1.2238	0.972467	1.27068	1.59094	0.608425	1.42629
hsa-miR-500a-3p	4.82711	0.72585	0.984199	1.71211	1.40767	2.30774	0	1.8357	1.16696	8.89476	0.489521	0.304212	1.55595
hsa-miR-500a-5p	3.53965	0.549709	0.864712	0.499365	1.40767	2.01928	31.9388	133.15	60.7468	1.01654	493.314	0.608425	340.299
hsa-miR-501-3p	6.6693	0.617969	0.923449	0.135059	4.22302	4.32702	23.5912	84.3199	178.415	4.32031	2.32522	3.65055	1.23179
hsa-miR-5010-3p	72.3379	0.625293	0.923449	1.4981	1.23171	4.03855	0	3.18188	4.58348	0	1.95808	1.97738	4.01953
hsa-miR-5010-5p	4.22458	0.014352	0.170384	4.20894	0.527878	0.288468	0	1.34618	1.68561	1.27068	2.4476	0.760531	1.55595
hsa-miR-502-3p	16.1095	0.146361	0.494494	3.83955	6.15857	6.63476	1.8147	2.4476	1.55595	5.84513	70.7357	5.17161	87.3924
hsa-miR-503-5p	17.7544	0.0959841	0.431463	1.71211	0.527878	1.15387	0	1.95808	1.36145	0	4.03855	2.73791	0.713143
hsa-miR-504-5p	0.505932	1	1	93.8093	46.4532	28.8468	2.90353	2.69236	0.453818	37.1039	4.40569	49.7387	2.13943
hsa-miR-505-3p	8.38145	0.342164	0.722178	0.713379	0.351918	0.288468	9.79941	0.979041	0.194493	1.01654	1.95808	0.456318	1.16696
hsa-miR-505-5p	6.90368	0.238505	0.62038	2.06499	1.05576	0.865404	212.683	39.6512	17.8286	6.09926	6.36377	3.95476	3.43605
hsa-miR-5187-5p	2.27762	1	1	80.7545	25.5141	19.0389	869.97	1421.94	1885.16	8.89476	4.28331	22.2075	1.29662
hsa-miR-5189-3p	3.53965	1	1	80.5405	19.7074	23.0774	2.17765	5.01759	2.72291	5.59099	5.62949	19.4696	4.92717
hsa-miR-532-3p	4.72163	0.244341	0.621592	0.35669	2.28747	0	2.54059	2.32522	1.23179	2.54136	27.4132	0.304212	21.135
hsa-miR-532-5p	7.14598	0.470351	0.800419	10.0586	6.33453	6.92323	28.3094	132.66	52.5132	1.01654	3.79379	7.14899	3.76021
hsa-miR-542-3p	2.88165	0.00584134	0.100168	4.99365	2.63939	1.73081	20712.7	77443.6	70292.6	7.62408	2.20284	4.41108	4.7975
hsa-miR-542-5p	3.84003	0.182136	0.546016	1.64077	1.75959	2.30774	2.17765	0.611901	0.972467	2.03309	37.0812	0.760531	19.579
hsa-miR-548a-3p	31.6489	1	1	1.71211	1.05576	0	4.35529	8.44423	3.9174	1.01654	1228.33	0.912637	2260.4
hsa-miR-548at-5p	2.26491	1	1	21.6613	26.7458	17.0196	0	1.95808	2.16696	37.358	45.2807	32.3986	34.2308
hsa-miR-548az-5p	2.21999	1	1	27.132	28.6813	47.5972	0	2.85666	2.42629	65.5671	101.331	64.9493	76.0469
hsa-miR-548e-3p	4.63986	0.608311	0.920418	15.1236	33.6082	70.9631	0	0	0.194493	3.30377	1.8357	13.6896	2.00977
hsa-miR-548e-5p	0.749581	0.65352	0.942616	2.3478	17.42	15.0003	15.2435	1.46856	1.68561	2.28722	1.8357	5.0195	1.16696
hsa-miR-548g-5p|hsa-miR-548x-5p|hsa-miR-548aj-5p	6.07466	1	1	3.84717	1.93555	1.44234	2.17765	0.489521	0.518649	2.7955	0.611901	3.49844	3.9547
hsa-miR-548h-3p|hsa-miR-548z	2.97752	0.482244	0.808981	2.71084	0.351918	0	0.725882	4.28331	1.55595	1.27068	1.10142	0.152106	1.36145
hsa-miR-548j-5p	0.921521	0.450372	0.787666	1.07007	0.175959	1.15387	8.71058	13.3394	13.2256	0.508272	23.0075	1.21685	8.62254
hsa-miR-548k	2.95313	0.72699	0.984199	3.35288	1.05576	4.32702	1.45176	0.734281	2.9174	3.04963	227.872	2.12949	142.564
hsa-miR-548l	1.31609	0.340056	0.722178	1.78345	4.7509	4.61549	74.4029	170.476	117.474	1.52482	25.6998	1.82527	5.8348
hsa-miR-548n	4.12616	0.72699	0.984199	1.4981	0.879796	1.15387	0	2.08046	1.49112	1.27068	2.93712	1.06474	1.49112
hsa-miR-550a-3p	10.4599	0.7655	1	3.5669	1.75959	4.32702	0	1.10142	4.51865	1.52482	19.7032	1.82527	12.7717
hsa-miR-550a-5p	293.485	0.289832	0.670961	2.85352	4.04706	2.01928	1.08882	12.8499	3.43605	4.57445	5769.12	2.73791	6086.41
hsa-miR-551a	0.948498	0.200527	0.587621	1.42676	1.05576	0	46.8194	67.0643	70.2121	2.7955	3.6714	0.304212	2.39875
hsa-miR-570-3p	8.3784	0.508581	0.833385	3.13887	3.16727	3.46162	33.3906	24.7208	32.5452	6.3534	112.345	1.97738	255.564
hsa-miR-574-3p	2.71288	0.334745	0.722178	1.99746	1.23171	2.01928	0	1.10142	0.324156	0.508272	486.828	0.456318	1526.45
hsa-miR-574-5p	0.950398	0.233472	0.61072	0.998731	0.351918	0.288468	13.4288	18.1123	10.2433	1.77895	112.712	0.152106	27.6829
hsa-miR-576-3p	1.65259	0.893462	1	2.55547	1.93555	3.17315	0.725882	8.19947	9.20602	2.03309	7300.71	4.10687	9578.8
hsa-miR-576-5p	9.63339	0.578955	0.894823	2.92485	1.05576	1.15387	3.26647	3.6714	1.10213	0	1.46856	1.52106	6.61278
hsa-miR-582-3p	1.13662	1	1	1.35542	9.85371	3.46162	1.45176	1.2238	1.29662	0.508272	22.3956	2.4337	32.9342
hsa-miR-584-5p	11.0768	0.388116	0.749569	4.06626	1.05576	2.01928	47.5453	106.96	66.4519	0.762408	1.59094	0.608425	3.63054
hsa-miR-589-3p	0.898622	0.22757	0.601506	18.7619	23.5785	10.0964	46.0935	104.146	148.334	11.6903	10.0352	34.376	7.06659
hsa-miR-589-5p	9.75018	0.39527	0.750693	2.20767	3.69514	2.59621	21.0506	10.0352	5.18649	5.59099	0.24476	3.19423	1.10213
hsa-miR-590-3p	1.70669	0.487347	0.813134	3.2752	4.39898	2.88468	7.25882	2.81474	4.14919	8.13235	47.1164	2.73791	29.6278
hsa-miR-590-5p	1.38671	0.641683	0.928435	36.8104	8.79796	15.2888	0	1.59094	1.77797	9.40303	3.18188	15.3627	8.55771
hsa-miR-598-3p	1.27791	0.92782	1	1.35542	4.04706	3.46162	1.45176	1.97904	0.972467	0	2.69236	2.12949	0.388987
hsa-miR-6126	1.47577	0.636242	0.923449	54.8977	321.126	158.946	0.362941	2.69236	3.11189	149.432	12.9723	260.558	16.6616
hsa-miR-624-5p	4.15862	0.344711	0.722178	2.35415	1.05576	0.576936	1.45176	1.34618	1.16696	2.03309	1.46856	1.67317	1.49112
hsa-miR-625-3p	1.62296	0.00555883	0.100168	27.9645	16.0123	16.7311	2.54059	2.37188	1.55595	9.65717	1411.78	10.6474	649.803
hsa-miR-625-5p	2.18103	0.0195332	0.184586	2.85352	2.99131	4.03855	3.26647	1.8357	2.0746	2.03309	5.26235	4.8674	4.86234
hsa-miR-627-5p	9.56121	0.323099	0.719206	3.63823	3.51918	4.61549	1.45176	0.734281	0.907636	2.03309	0.489521	2.12949	0.324156
hsa-miR-628-3p	2.76959	0.800192	1	20.4026	6.68645	10.6733	0.362941	1.8357	3.11189	13.9775	3.0595	9.43058	4.53818
hsa-miR-628-5p	1.62165	1	1	0.279005	8.09412	8.65404	2.17765	6.97567	2.78774	3.04963	37.9379	5.0195	87.9759
hsa-miR-629-5p	8.06972	0.0263245	0.225709	3.99492	0.351918	0.865404	0	1.46856	1.81527	3.04963	1.2238	1.52106	0.388987
hsa-miR-636	2.27632	0.0557455	0.335197	4.78243	30.7929	21.6351	1.8147	1.59094	3.63054	34.3084	339.605	76.6615	1305.44
hsa-miR-642a-3p	0.899292	0.00261959	0.0758045	0.8459	1.75959	1.73081	0.362941	1.46856	2.77797	5.59099	322.105	4.71529	1329.1
hsa-miR-642a-5p	0.127092	1	1	6.91978	5.98261	6.92323	0.362941	1.8357	4.36145	0.254136	1.34618	3.65055	1.68561
hsa-miR-651-5p	6.0061	0.0170318	0.182279	15.195	9.85371	14.1349	1.8147	35.3679	7.19626	4.32031	1.34618	10.9516	3.50088
hsa-miR-6511a-3p	0.424012	0.2193	0.601506	2.71084	1.75959	1.73081	0.725882	2.81474	2.78774	1.01654	5.13997	2.28159	7.77974
hsa-miR-6511b-3p	1.76439	0.125513	0.472461	159.654	102.76	122.887	3.62941	2.81474	5.64831	73.6994	2.56998	57.344	1.36145
hsa-miR-652-3p	7.60297	0.738367	0.988046	4.35161	1.58363	2.59621	0	1.46856	7.75044	5.59099	1.2238	6.23635	4.01953
hsa-miR-654-3p	3.42284	0.208563	0.598122	0.856055	4.39898	36.0585	14.8806	20.8046	8.9467	0.762408	11.7485	1.82527	23.3392
hsa-miR-660-5p	10.8197	0.0218701	0.198546	0.142676	1.05576	7.78863	5.08117	3.18188	3.76021	1.01654	1.95808	2.89002	2.0746
hsa-miR-664a-3p	3.68628	0.549709	0.864712	7.20513	5.63069	8.36557	4.71823	10.2799	9.01153	0.508272	85.4214	2.89002	179.582
hsa-miR-664a-5p	2.54613	0.69695	0.980814	0.499365	0.351918	0.576936	8.71058	13.4618	46.1598	1.77895	5.26235	1.06474	1.42629
hsa-miR-664b-5p	1.68706	0.0707407	0.390323	0.428027	0.527878	0	0.725882	0.611901	3.9547	1.52482	1.95808	2.4337	2.85257
hsa-miR-671-3p	1.49447	0.288495	0.670961	32.6728	14.7806	14.7119	3.99235	1.73428	2.64831	21.6016	10.2799	14.1459	4.53818
hsa-miR-671-5p	2.91814	1	1	22.0434	12.845	5.19242	295.071	79.9142	209.016	8.64062	24.7208	7.90952	32.5452
hsa-miR-6734-5p	18.1434	0.582035	0.894823	275.935	125.283	68.0784	1.08882	1.34618	2.52841	41.9324	51.6444	62.9719	112.288
hsa-miR-6741-3p	3.8329	1	1	1.78345	1.58363	0.288468	8.34764	22.3956	32.9342	1.77895	1.46856	2.4337	1.68561
hsa-miR-6741-5p	3.24639	0.2193	0.601506	45.5136	36.7755	40.3855	2.17765	1.2238	2.85257	27.1926	1.95808	29.5086	1.16696
hsa-miR-6776-5p	0.254723	0.270109	0.654766	1.21274	0.175959	0.288468	2.17765	1.10142	2.85257	2.7955	2.20284	1.82527	1.42629
hsa-miR-6803-3p	0.416454	0.000192156	0.0148281	2.85352	2.28747	2.59621	24.68	10.7695	9.59501	4.82858	2.56998	4.25897	5.12166
hsa-miR-6805-5p	5.15256	0.687866	0.97772	3.49556	5.27878	2.01928	3.99235	1.46856	1.25932	3.5579	36.2245	2.73791	224.64
hsa-miR-6842-3p	5.59245	1	1	4.49429	2.11151	1.15387	63.8776	18.6018	9.07636	3.5579	163.01	1.67317	369.602
hsa-miR-6852-5p	11.311	1	1	1.85479	0.703837	0	0	0.979041	2.78774	2.28722	1916.23	1.97738	5306.56
hsa-miR-7-1-3p	4.17274	0.853884	1	1.56943	0.175959	0.288468	12.34	12.238	31.7024	1.77895	1.2238	0.912637	0.972467
hsa-miR-7-5p	3.66713	0.114295	0.464198	0.35669	2.11151	5.19242	2.17765	2.56998	2.39875	2.28722	71.5924	2.73791	162.856
hsa-miR-744-5p	2.91817	0.0112275	0.144399	1.28408	0.703837	0.288468	14.1547	7.46519	23.4689	7.11581	1.2238	6.23635	2.65808
hsa-miR-766-3p	2.20553	0.144792	0.494494	2.49683	0	0	5.44411	2.56998	12.1883	1.52482	63.5153	1.52106	224.575
hsa-miR-769-3p	4.71268	0.630215	0.923449	2.71084	2.11151	2.88468	0.362941	0.36714	0.129662	2.28722	1.2238	3.04212	0.648311
hsa-miR-769-5p	7.06487	0.95081	1	5.49302	1.23171	0	0.725882	1.12238	0.259325	0.762408	2.93712	3.65055	2.20426
hsa-miR-7706	3.87726	0.0122194	0.152907	0.35669	2.28747	0.288468	53.3523	227.872	142.564	0.508272	19.7032	1.21685	76.3063
hsa-miR-7847-3p	2.21999	1	1	1.64077	0.351918	0.288468	5.44411	13.0947	3.76021	0.508272	1.8357	0.456318	0.713143
hsa-miR-7976	1.196	0.625293	0.923449	6.99111	2.63939	3.17315	6.17	2.08046	5.90764	1.77895	185.651	4.71529	429.506
hsa-miR-7977	1.03427	1	1	45.5451	44.8696	94.329	2.17765	1.95808	6.32416	146.128	3.18188	102.672	3.76021
hsa-miR-874-3p	2.40331	0.124233	0.472461	141.978	133.201	79.9056	1.8147	2.32522	6.80727	251.595	1.46856	245.804	7.52041
hsa-miR-875-5p	0.112224	0.844579	1	2.6395	1.93555	2.59621	0.725882	1.34618	5.51865	4.82858	3.0595	3.19423	6.48311
hsa-miR-885-3p	1.29539	0.0177161	0.182279	2.28281	2.46343	2.30774	1.8147	2.08046	4.0373	4.32031	2.20284	1.67317	1.23179
hsa-miR-885-5p	2.91379	0.724065	0.984199	20.26	12.845	16.4427	11.6141	35.3679	35.2033	3.30377	1.2238	12.7769	2.65808
hsa-miR-887-3p	200.746	0.453766	0.787666	7.41914	2.28747	0.576936	5.44411	6.36377	9.72467	11.9444	0.856661	5.47582	1.55595
hsa-miR-9-3p	0.326246	0.273636	0.659863	1.07007	1.93555	2.01928	161.146	186.018	328.046	6.09926	20.8046	1.21685	8.9467
hsa-miR-9-5p	0.220272	0.0278239	0.234227	1.42676	0.527878	0	0	0.734281	1.0373	0	167.906	0.912637	254.203
hsa-miR-92a-3p	3.67793	0.00896957	0.122144	5.42168	3.16727	2.30774	26.1317	28.3922	30.1465	3.81204	0.979041	3.80265	0.194493
hsa-miR-92b-3p	2.91663	0.00429986	0.0995417	17.1924	14.9565	12.4041	0	1.71332	6.71314	12.7068	1.46856	20.8385	1.42629
hsa-miR-92b-5p	4.07048	0.0056951	0.100168	0.0713379	1.93555	0.865404	2.54059	3.54902	1.29662	1.27068	1.10142	4.8674	1.68561
hsa-miR-93-3p	899.858	0.127216	0.473515	1.85479	0.527878	1.73081	13.4288	4.16093	1.36145	1.27068	1.8357	3.04212	5.44582
hsa-miR-93-5p	6.33746	0.208395	0.598122	0.713379	2.28747	2.88468	1.45176	1.95808	2.38899	1.01654	37.3259	2.73791	41.8161
hsa-miR-941	1.60125	0.0157362	0.173665	1.99746	1.58363	1.15387	2.17765	12.1156	7.58524	0	0.979041	1.06474	0.713143
hsa-miR-942-5p	3.48529	0.439347	0.785397	5.279	7.39029	2.30774	0.725882	1.46856	0.58348	1.27068	2.32522	12.4727	4.40852
hsa-miR-95-3p	1.37415	0.567141	0.887115	42.6601	47.333	3.46162	1.45176	1.95808	4.90764	14.2316	3.30426	152.715	2.98223
hsa-miR-96-5p	3.85887	0.537433	0.86342	1395.28	6444.51	7025.35	0	2.56998	1.36145	14005.9	3.18188	16617	4.66784
hsa-miR-98-5p	1.27503	0.349904	0.727285	41.0193	12.4931	10.0964	0	0.611901	10.0648	40.6618	0.611901	40.7644	2.39875
hsa-miR-99a-5p	2.0297	0.94885	1	1.84971	0.703837	0.576936	0	1.2238	2.00977	22.1098	1.34618	6.69267	0.777974
hsa-miR-99b-5p	1.15814	0.391783	0.749569	8.98858	1.58363	3.17315	2.54059	3.42664	1.81527	7.62408	3.54902	6.23635	1.29662
22_21404	5.59245	0.0711682	0.390323	176.207	1310.19	1944.85	0.725882	0.611901	1.36145	2402.09	0.734281	2703.84	1.55595
6_28333	2.26491	0.549709	0.864712	6.49175	2.81535	5.19242	0	0.36714	0.0648311	24.1429	421.844	12.6248	660.435
9_34503	2.62122	1	1	1.61538	5.45473	8.65404	2.90353	3.6714	2.39875	11.9444	1908.27	12.4727	3388.66
17_13888	7.64525	1	1	1.64077	5.80665	3.46162	1.8147	1.10142	5.32416	1.01654	1.95808	5.47582	2.46358
22_21817	108.007	0.453766	0.787666	85.5341	37.4793	45.5779	1.08882	1.2238	0.388987	55.1475	0.611901	30.5733	0.842805
19_16508	2.56183	0.180759	0.546016	70.4818	49.0926	90.8674	3.26647	2.20284	1.23179	94.5386	11.0142	78.6389	33.9067
2_19216	1.63347	0.180457	0.546016	76.9023	65.4568	25.0967	1.45176	3.6714	15.9076	25.1595	17.8675	41.0687	2.9174
2_18964	0.261069	0.0157536	0.173665	0.784717	1.58363	0.865404	0.362941	2.69236	1.36145	0	6.11901	0.608425	6.93693
12_7844	0.0137973	1	1	35.5976	100.297	39.2316	0.725882	1.2238	1.10213	23.3805	8.32185	78.6389	3.50088
12_7737	0.0551595	0.583664	0.894823	2.71084	0.351918	1.73081	2.17765	0.856661	3.11189	5.59099	64.372	3.04212	29.2388
1_2816	0.944478	0.124842	0.472461	2.71084	1.23171	1.15387	70.4105	329.447	183.342	0	1.71332	1.52106	0.713143
16_12027	1	0.0314336	0.235783	3.13887	1.40767	0.865404	0.362941	0	1.06483	1.01654	15.4199	1.36896	20.8756
19_15971	0.155613	0.180457	0.546016	3.70957	1.93555	0	124.126	216.001	59.8391	2.03309	1.34618	1.36896	0.972467
1_3242	8.37347	1	1	2.35415	0.175959	0.288468	0.725882	2.32522	1.29662	0.508272	9.91279	0	26.127
19_16224	0.327632	0.0487373	0.312119	1.07007	0.175959	0	3.62941	5.26235	1.8801	1.52482	8.32185	1.21685	1.94493
16_12028	1	0.0314336	0.235783	3.06753	1.23171	1.73081	32.6647	20.0703	8.62254	1.77895	152.119	4.41108	764.618
1_1675	207.88	1	1	0	1.75959	0.576936	5.80706	1.10142	1.8428	0.508272	0.734281	0.456318	0.907636
2_18085	0.313812	0.22757	0.601506	0.784717	0.527878	0.288468	3.99235	15.0528	9.14119	2.54136	156.524	2.89002	80.9741
8_32850	0.0266532	0.901845	1	0.428027	0	0.288468	2.17765	5.26235	1.29662	2.03309	58.0082	1.52106	39.0283
11_5791	0.203323	1	1	0	1.05576	1.73081	1.45176	3.30426	2.46358	1.01654	410.341	1.67317	100.294
10_4444	0.0935899	0.055048	0.335197	0.713379	4.22302	7.2117	4.35529	2.32522	1.23179	16.773	7.34281	6.69267	20.2273
1_349	0.0205541	0.101565	0.436384	2.92485	3.51918	2.01928	34.4794	21.906	11.9289	9.1489	1.71332	6.23635	1.10213
6_28296	0.0677082	0.1899	0.563614	0	1.40767	3.17315	1.45176	0.611901	2.19449	0	318.433	0.304212	1491.83
4_25181	0.00832431	1	1	0.214014	0.351918	1.44234	0.362941	0.24476	1.06483	3.04963	1.46856	1.36896	1.23179
6_28885	0.0307347	0.724273	0.984199	2.0688	0	0.288468	13.4288	0.24476	3.71314	0	31.5741	1.67317	6.61278
8_32849	0.0266532	0.901914	1	0.0713379	2.11151	2.59621	6.17	1.2238	3.64831	0.762408	226.526	1.06474	396.831
1_2753	0.205168	0.425237	0.781289	0	1.40767	3.17315	2.17765	0.489521	2.19449	0	1.8357	0.304212	1.29662
