# Supplementary figures and images for: Study of miRNA and lymphocyte subsets as potential biomarkers for the diagnosis and prognosis of gastric cancer
Source: PeerJ journal article supplement (doi:10.7717/peerj.16660), 2024-01-19

Description

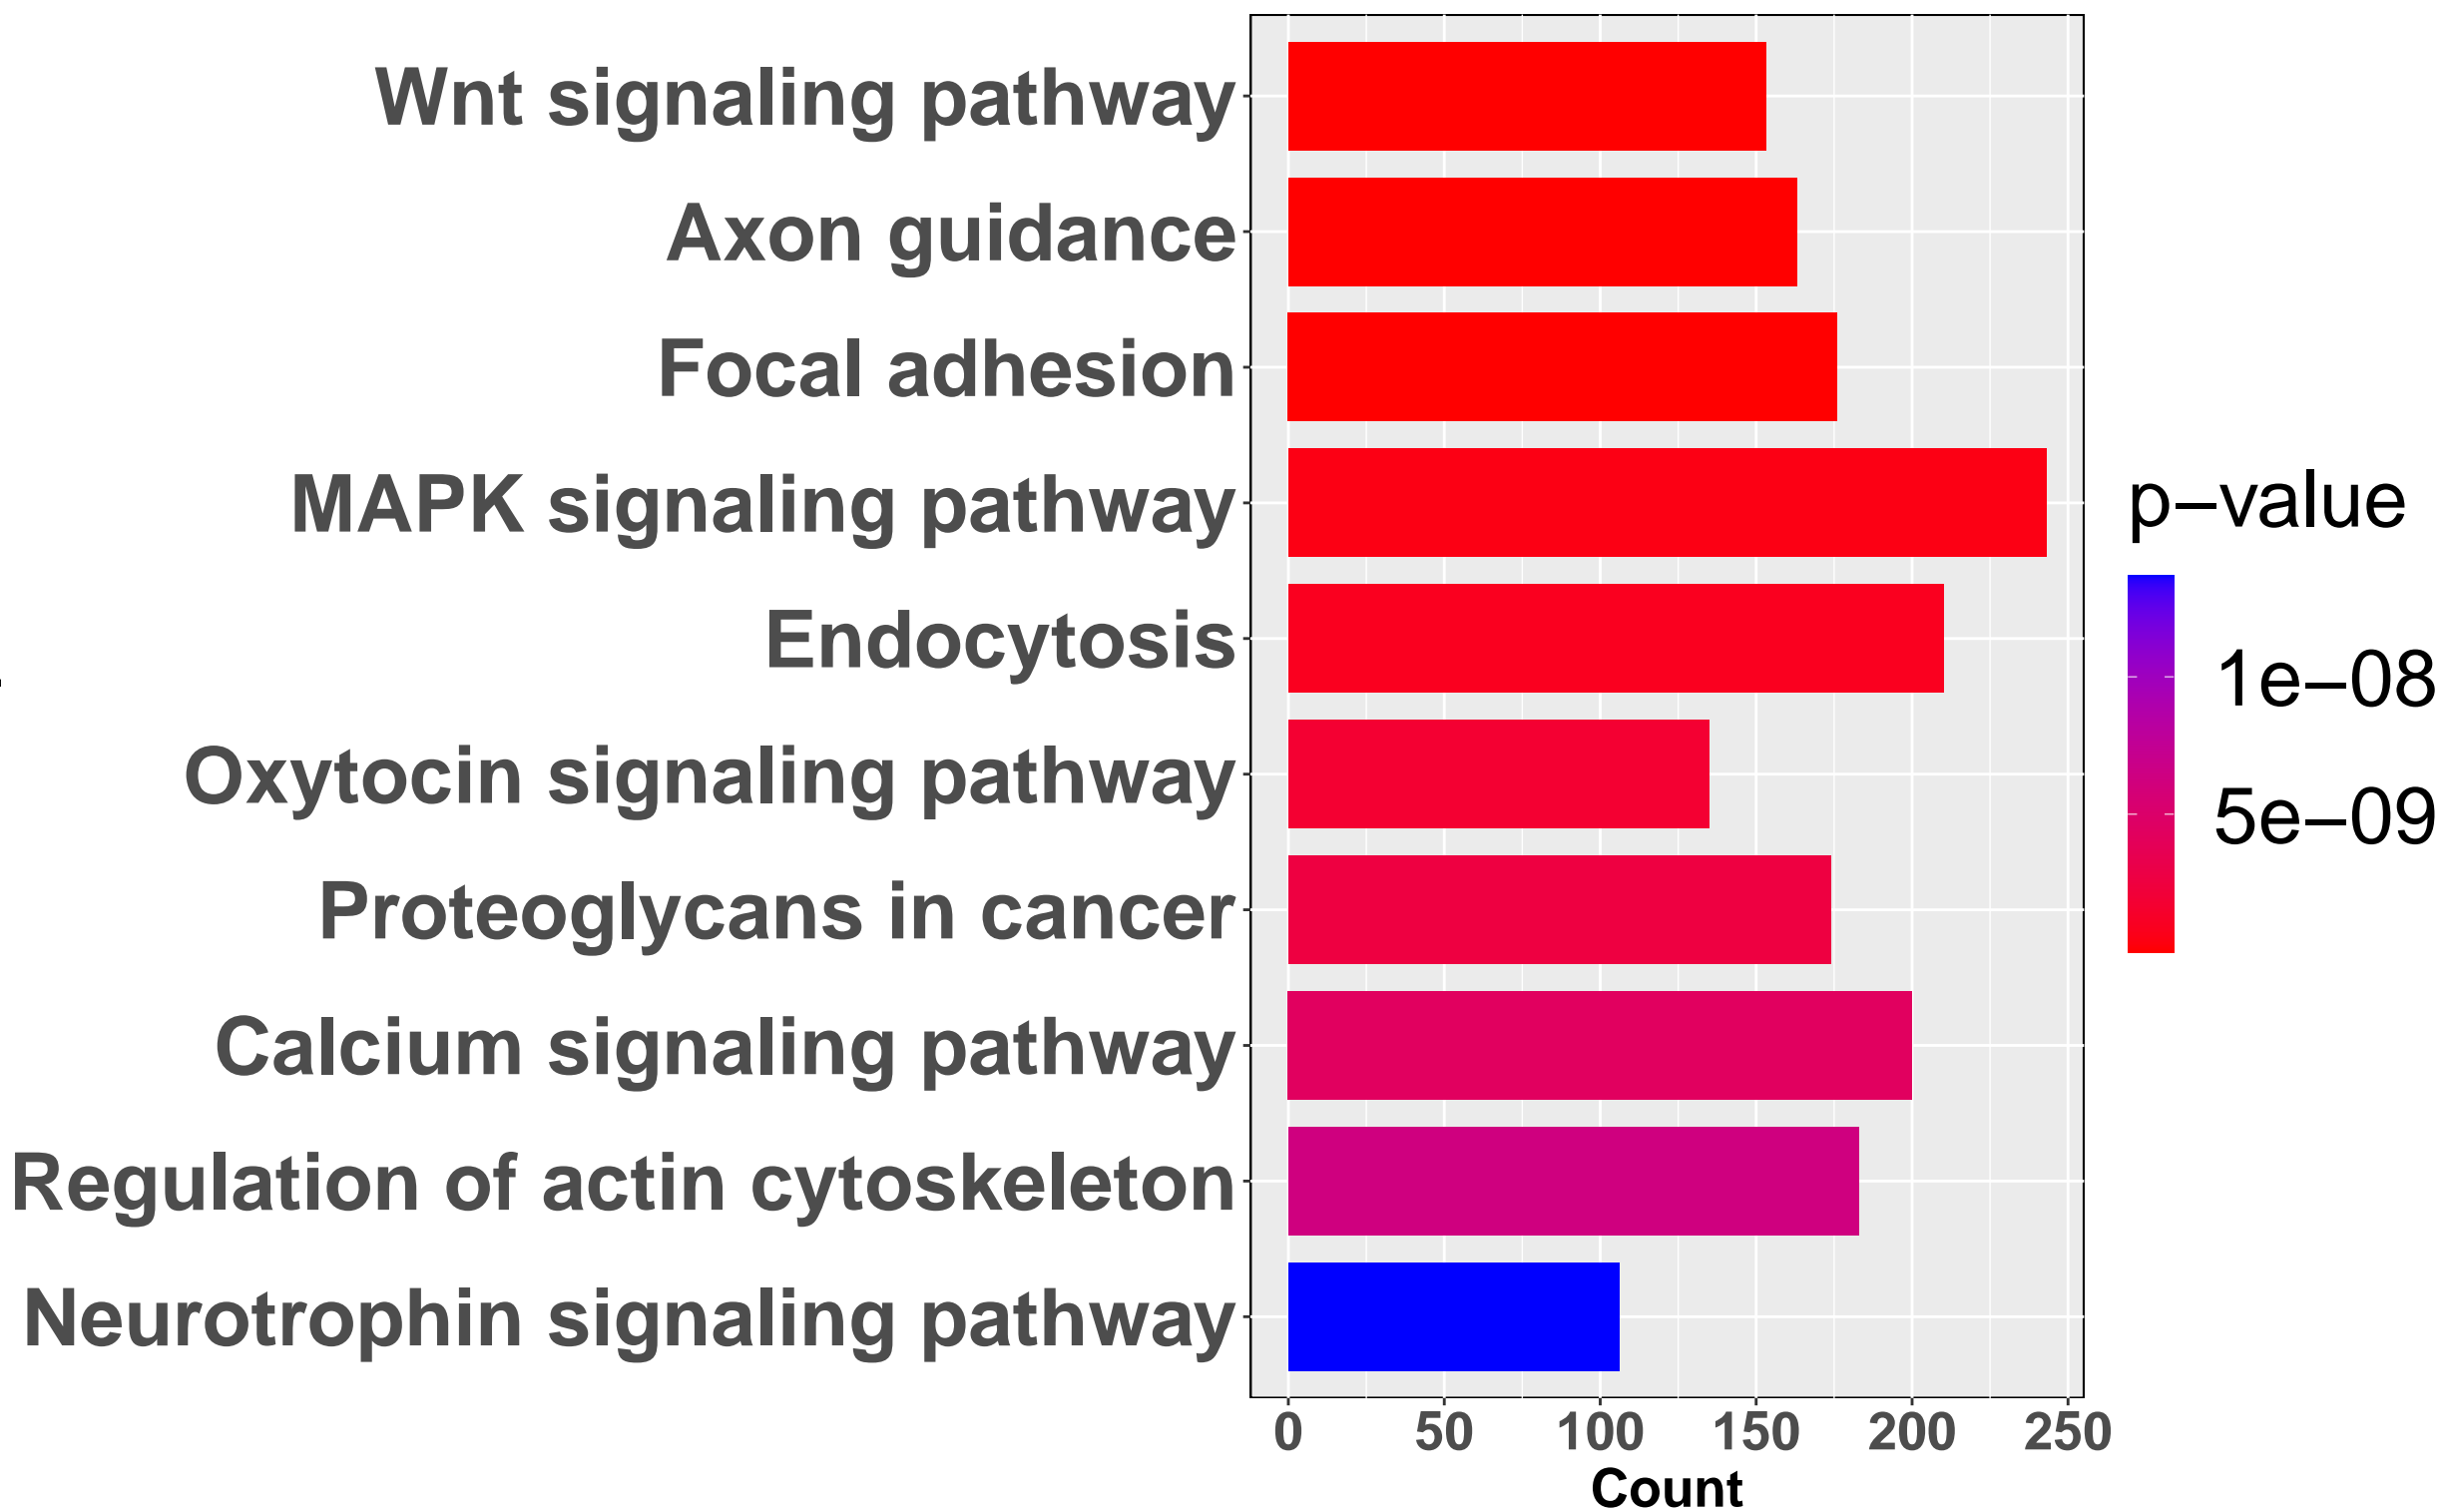

Supplement: SequenceData.zip [file SequenceData.zip]

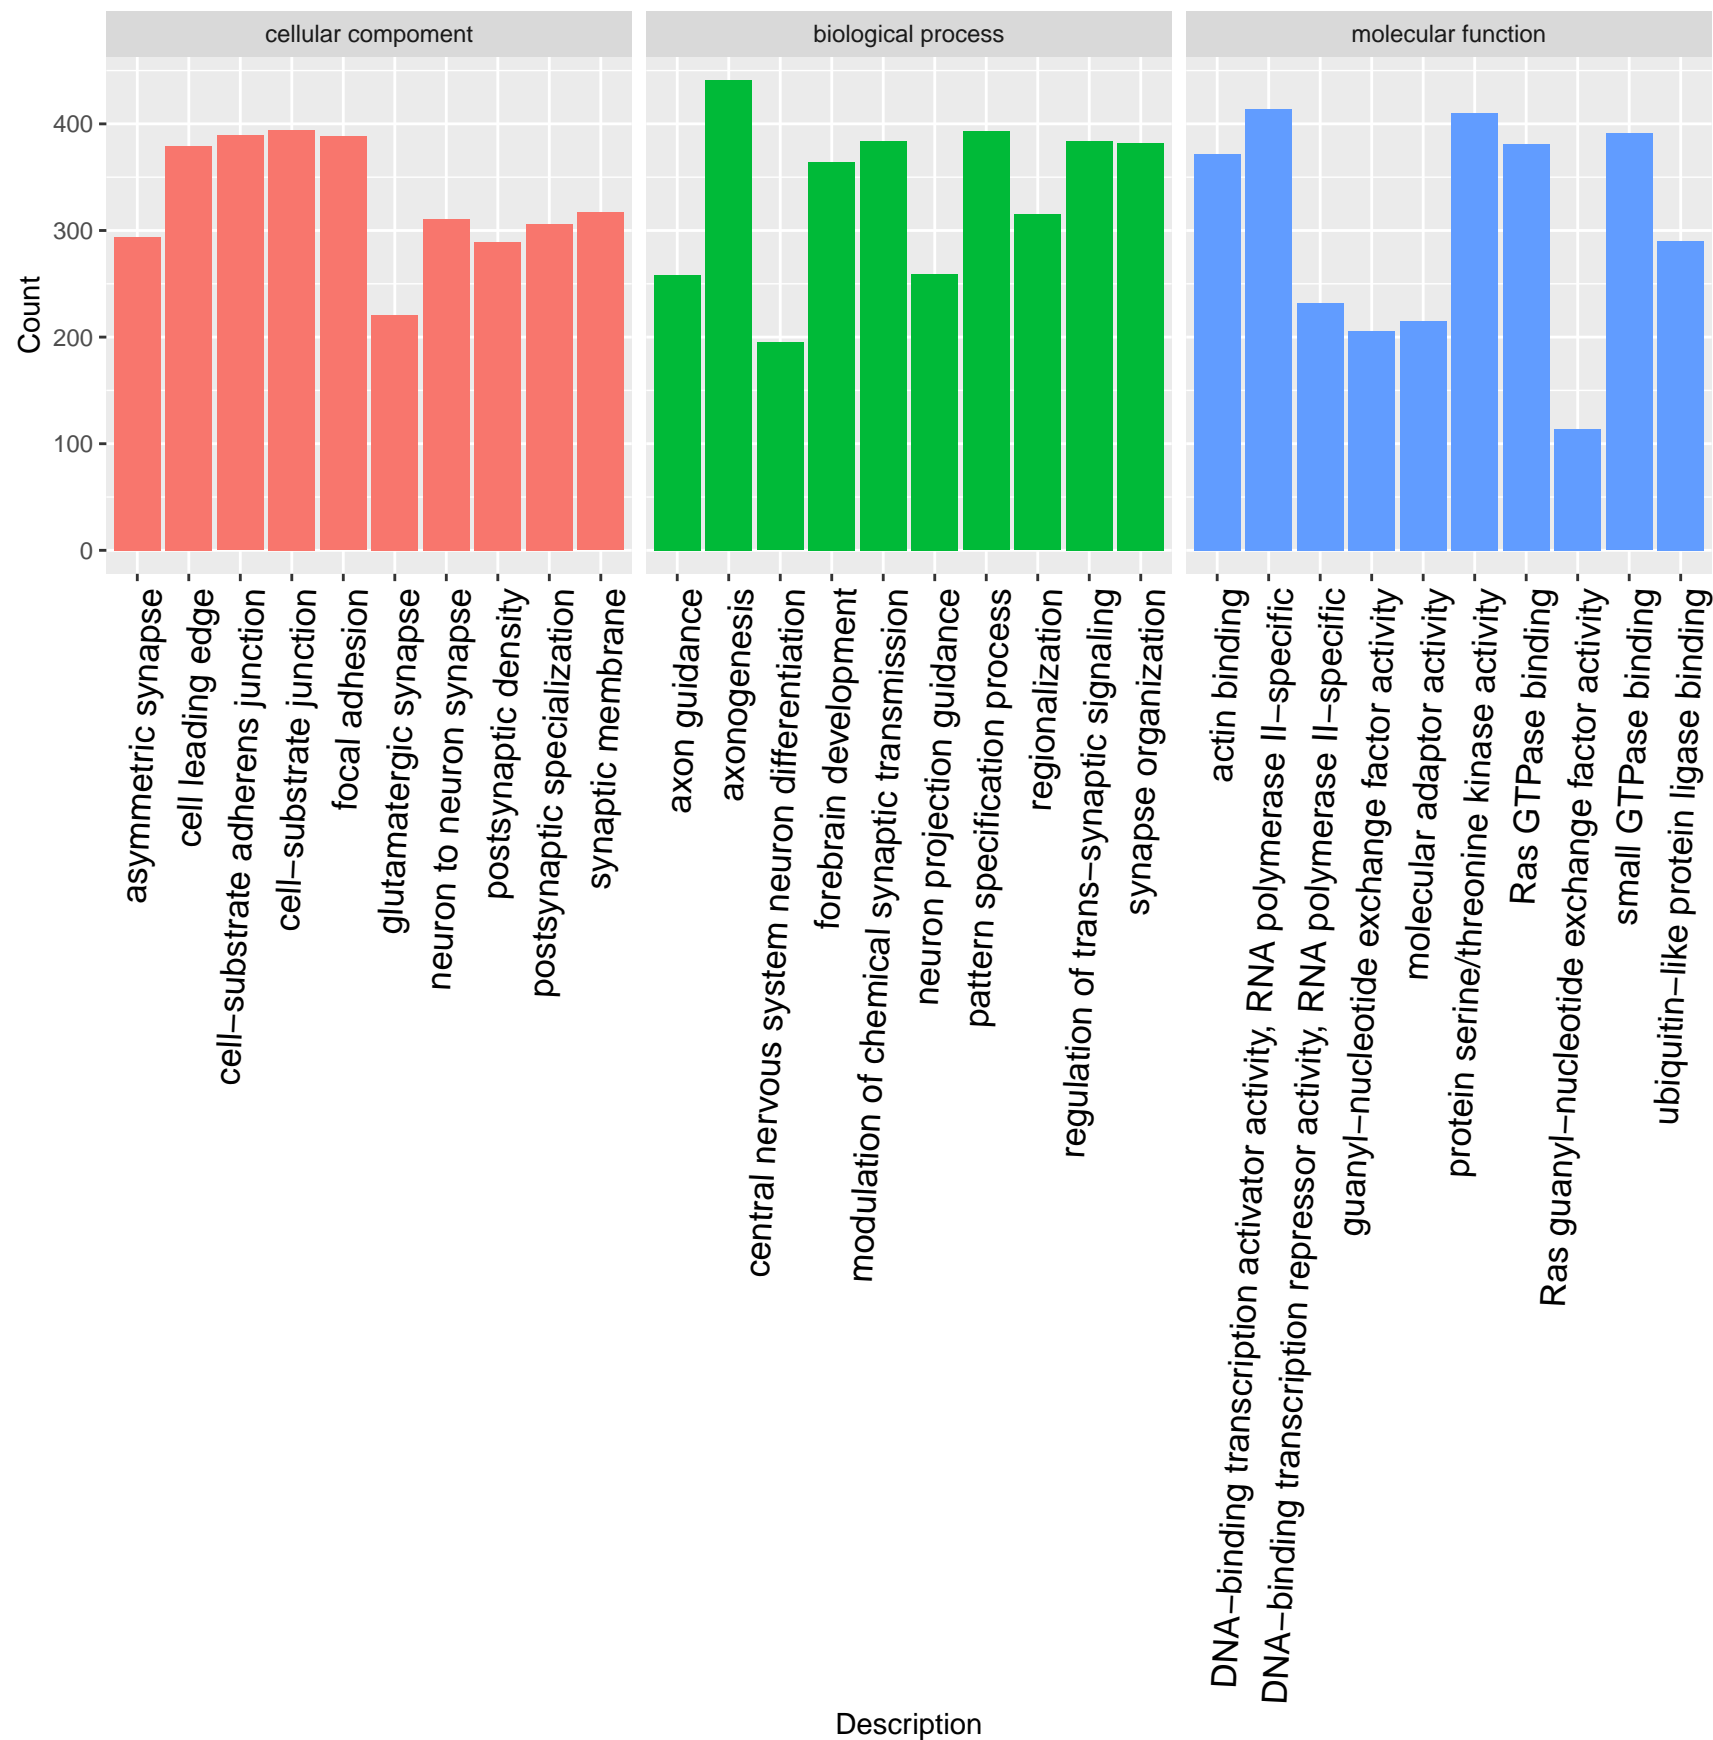

Supplement: SequenceData.zip [file SequenceData.zip]

Heatmap

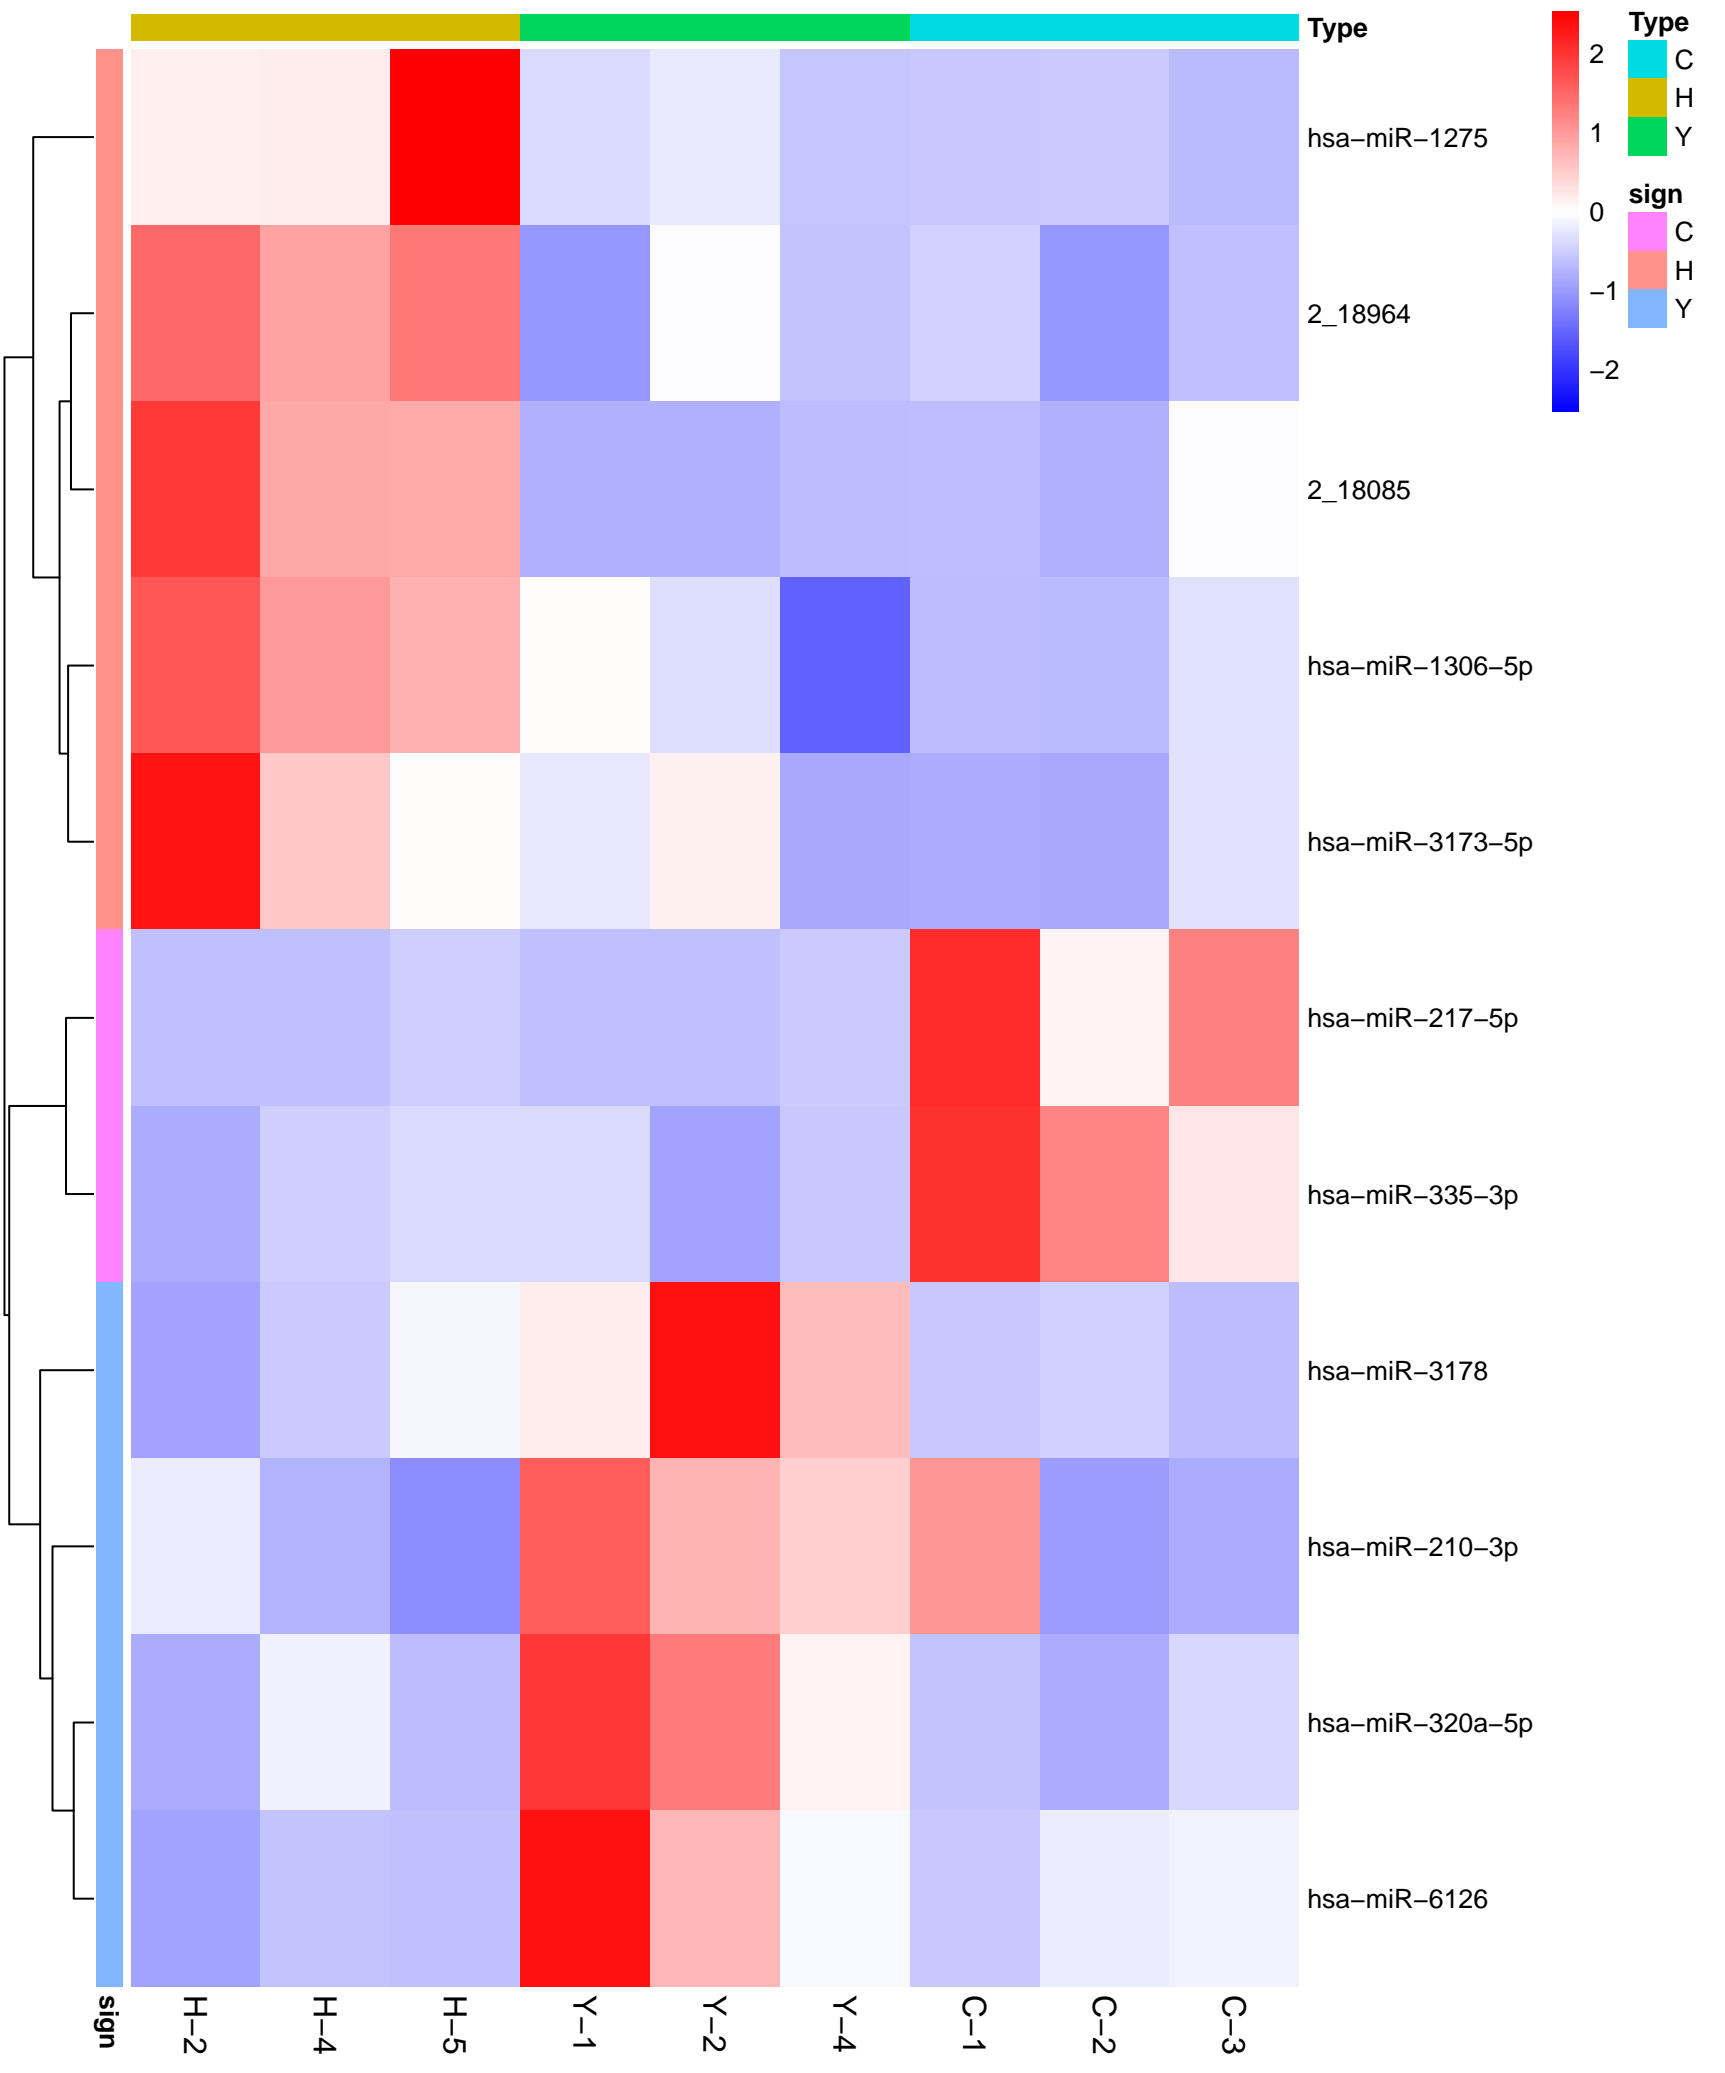

Supplement: SequenceData.zip [file SequenceData.zip]

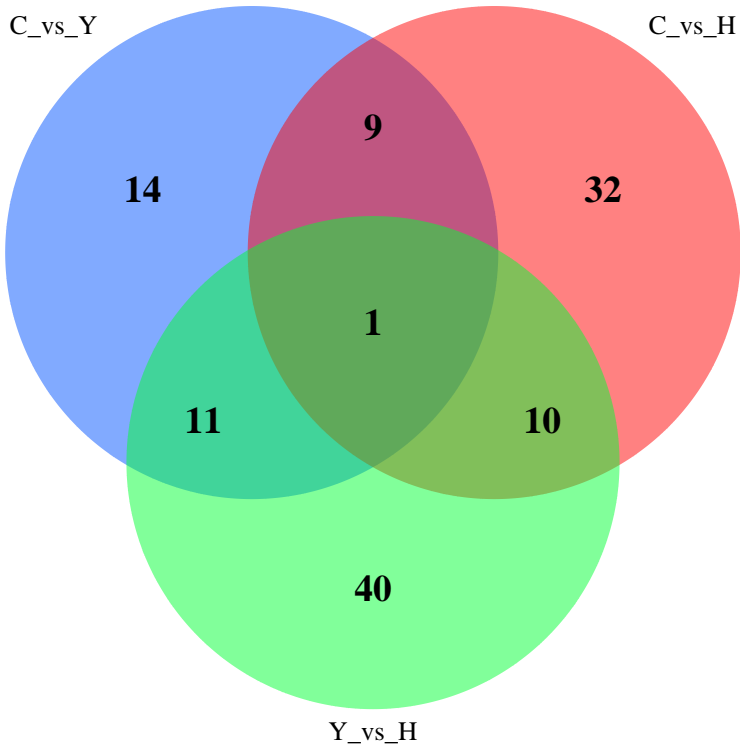

Supplement: SequenceData.zip [file SequenceData.zip]

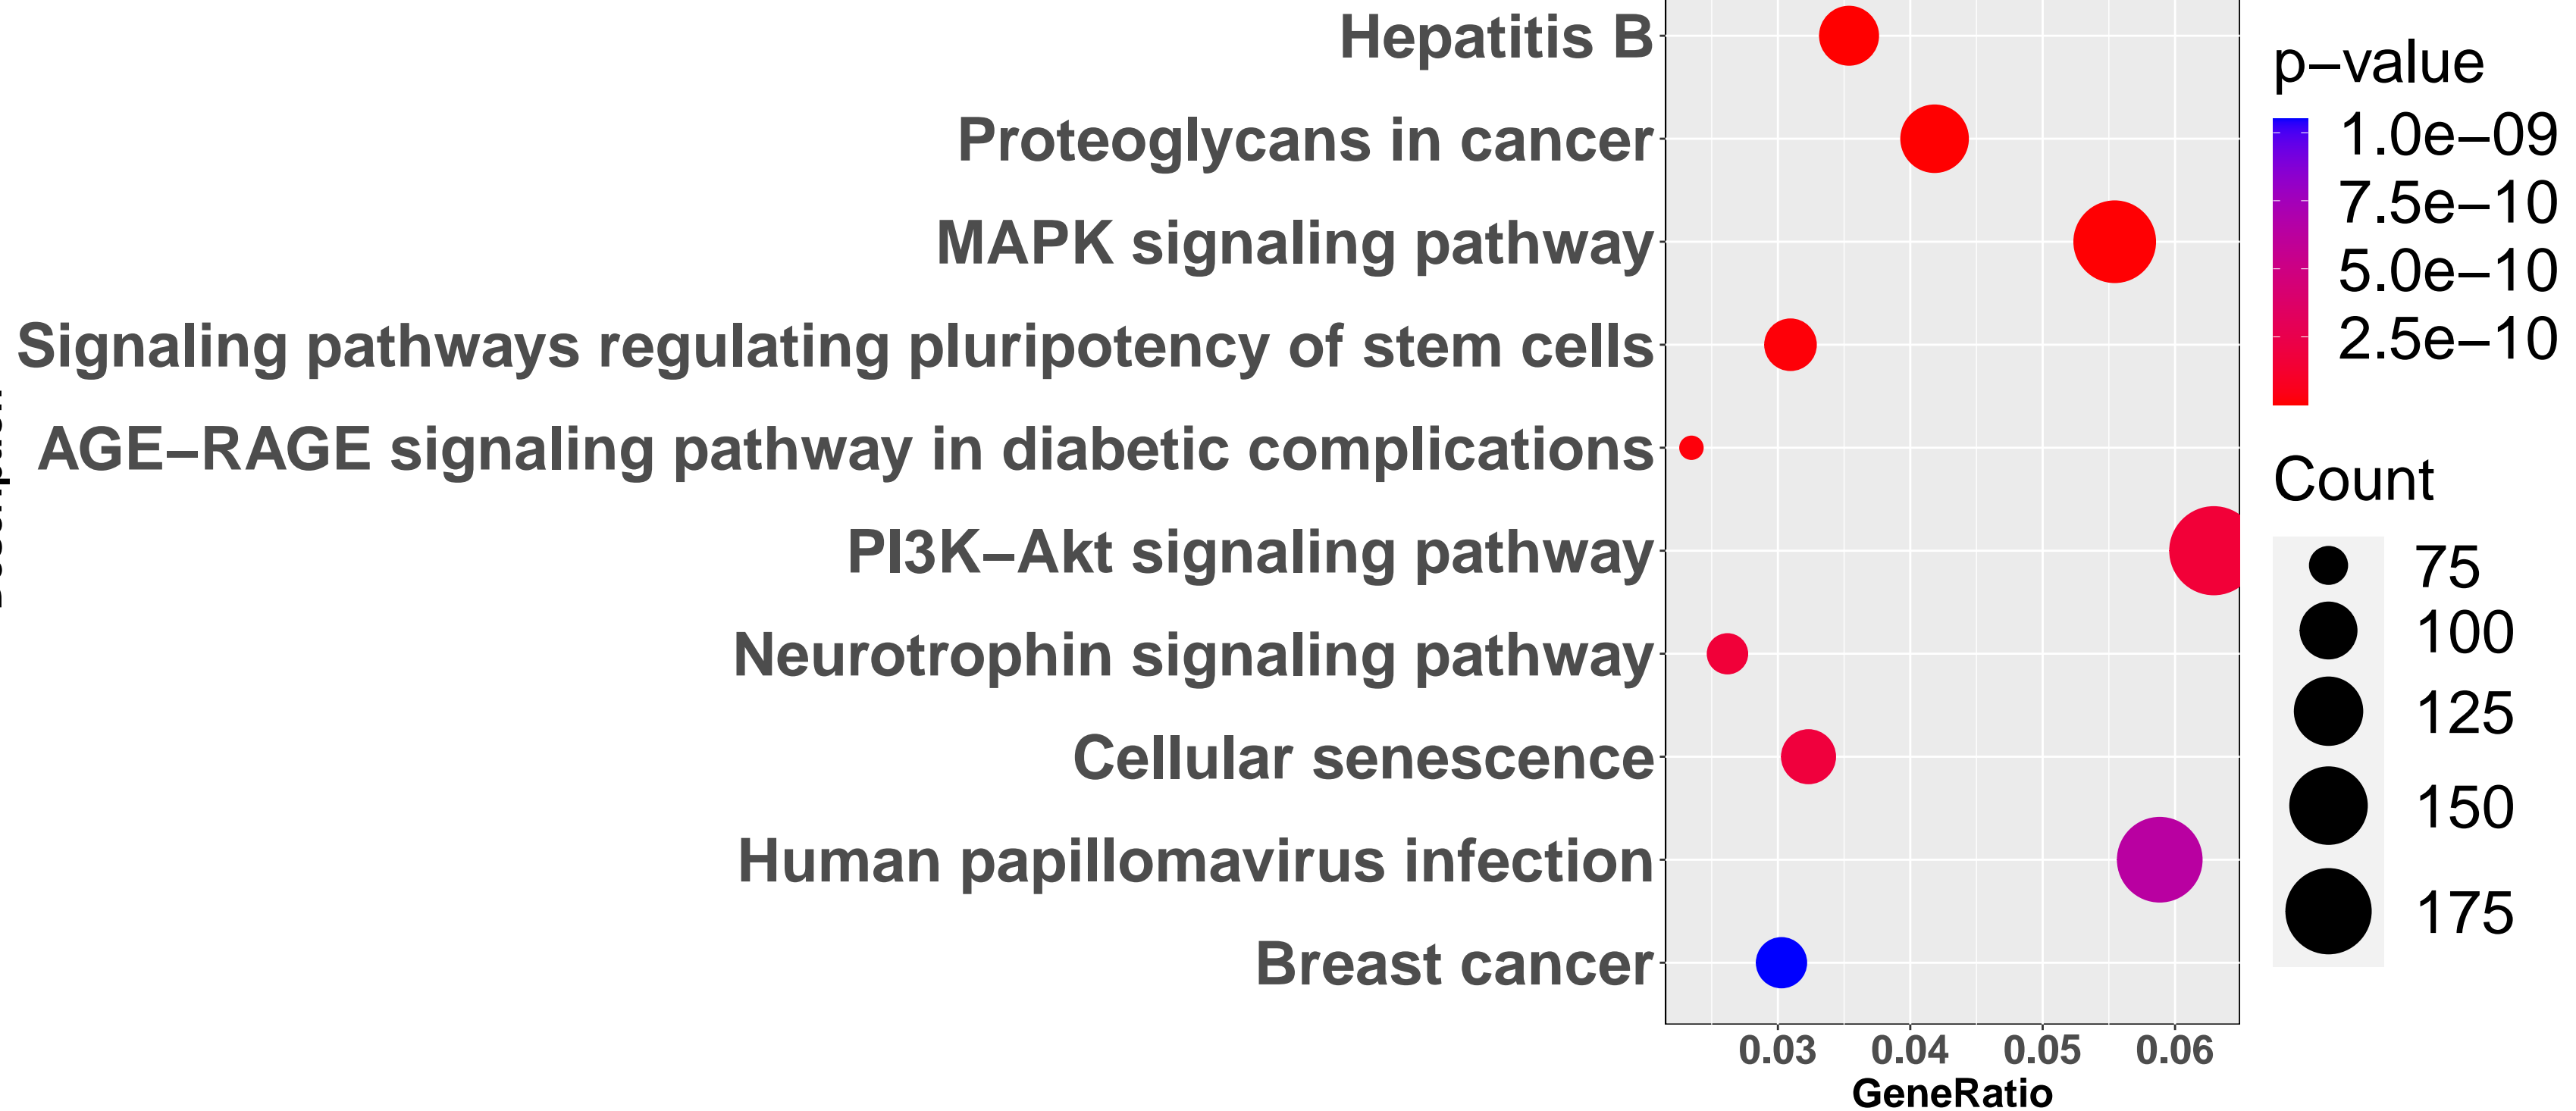

Supplement: SequenceData.zip [file SequenceData.zip]

MA plot of DEG

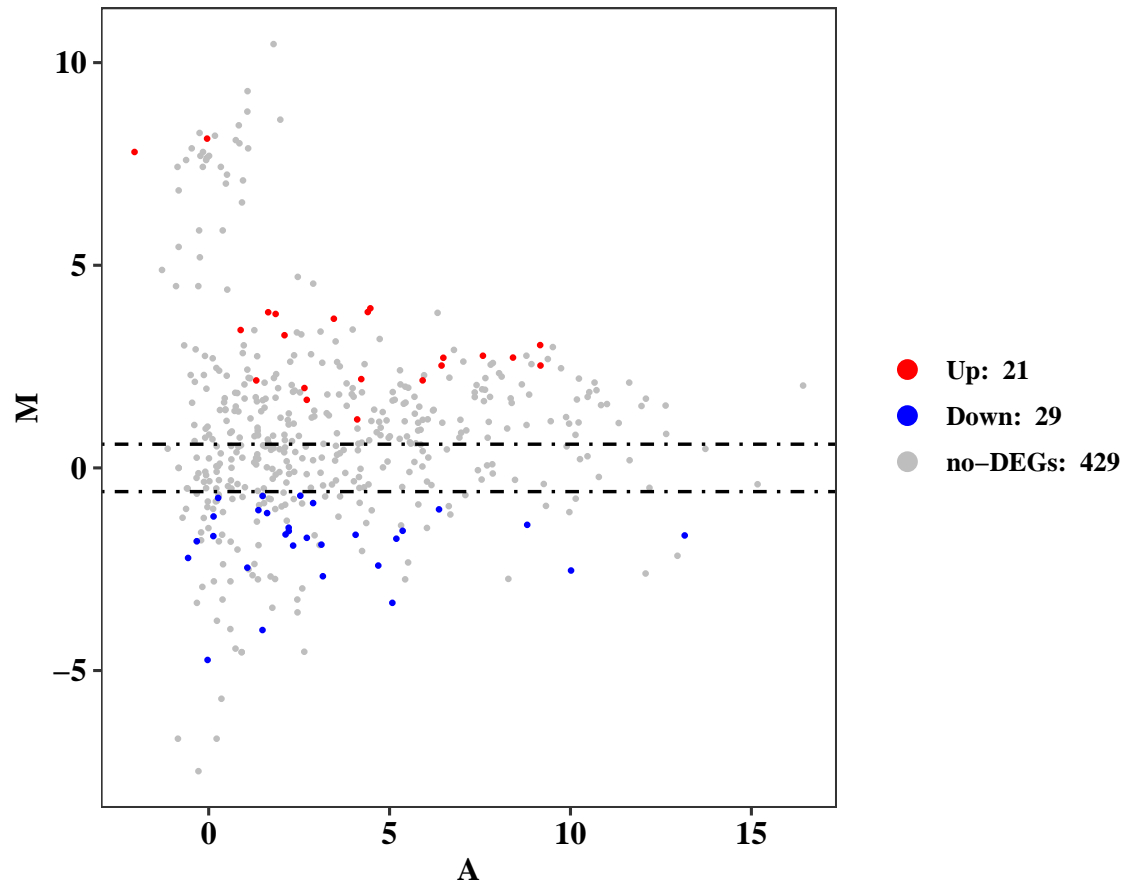

Supplement: SequenceData.zip [file SequenceData.zip]

Volcano plot of DEG

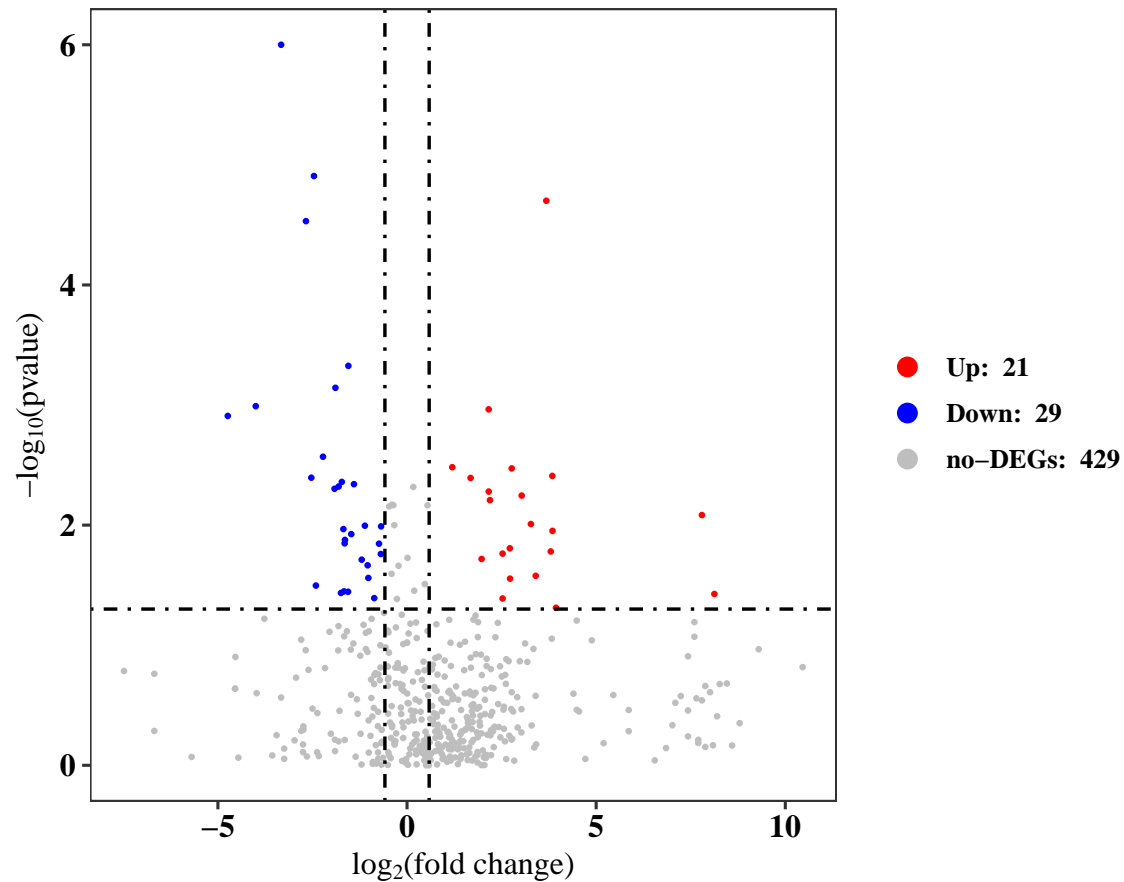

Supplement: SequenceData.zip [file SequenceData.zip]

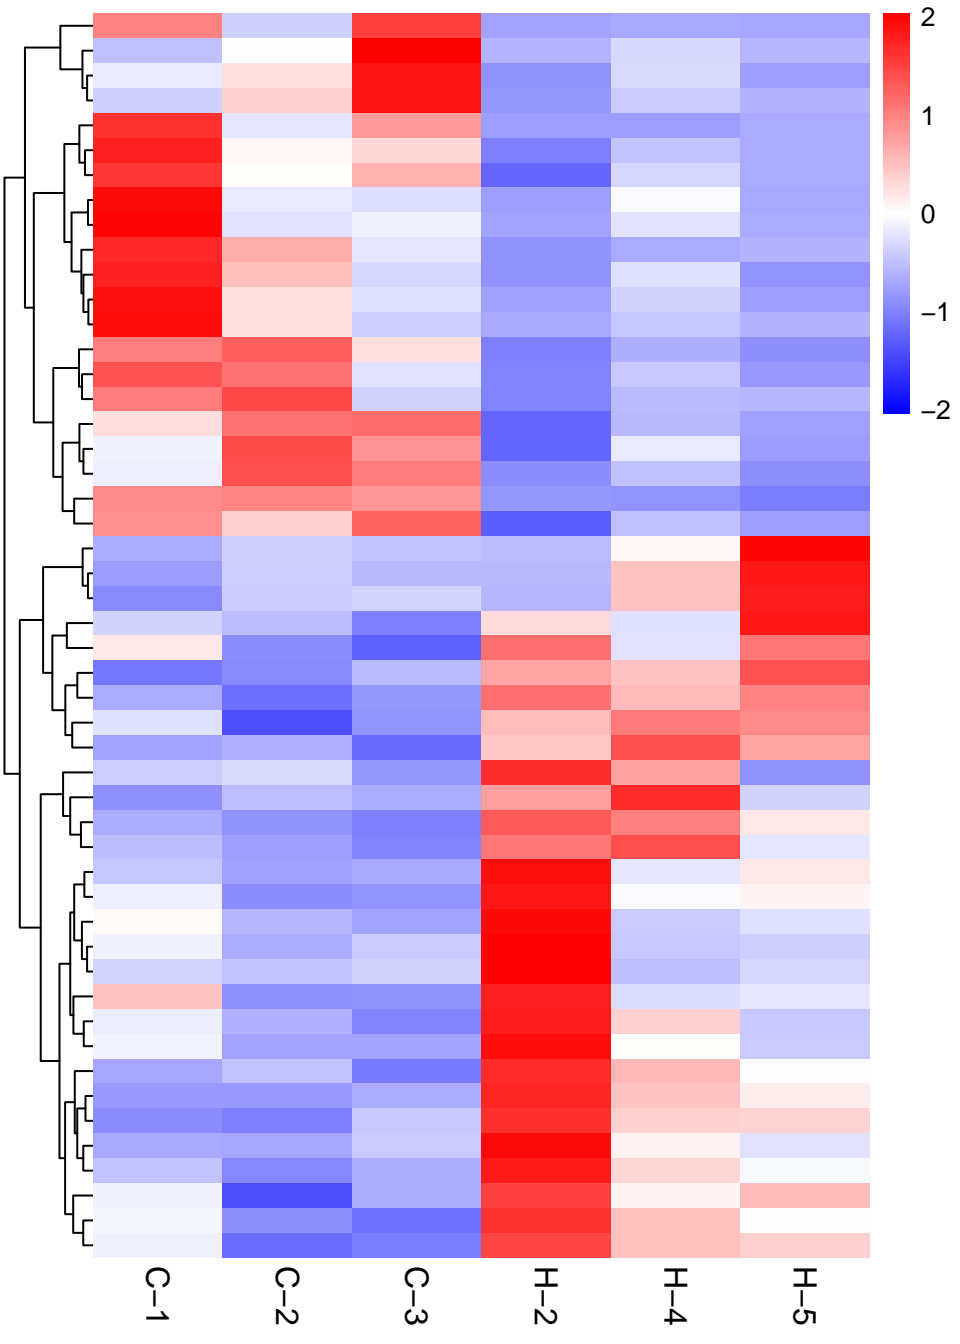

Supplement: SequenceData.zip [file SequenceData.zip]

Scatter plot of DEG

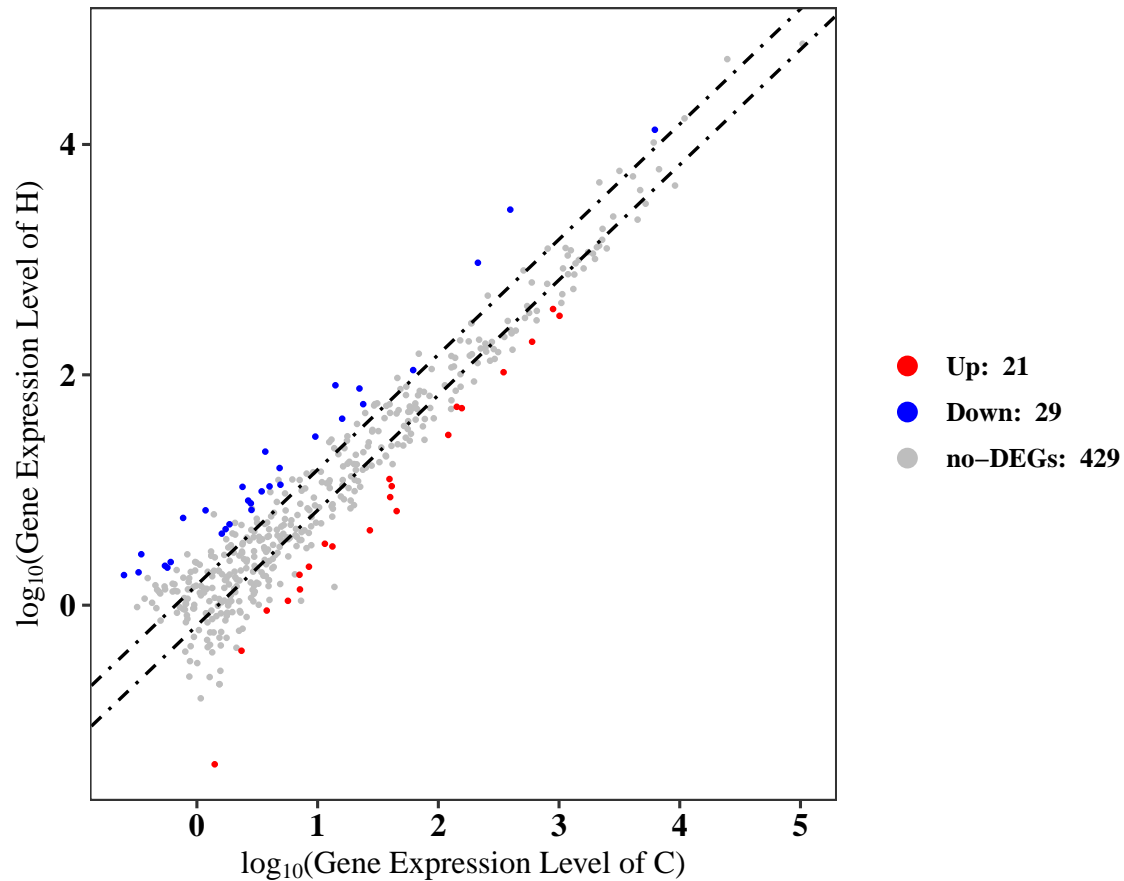

Supplement: SequenceData.zip [file SequenceData.zip]

Description

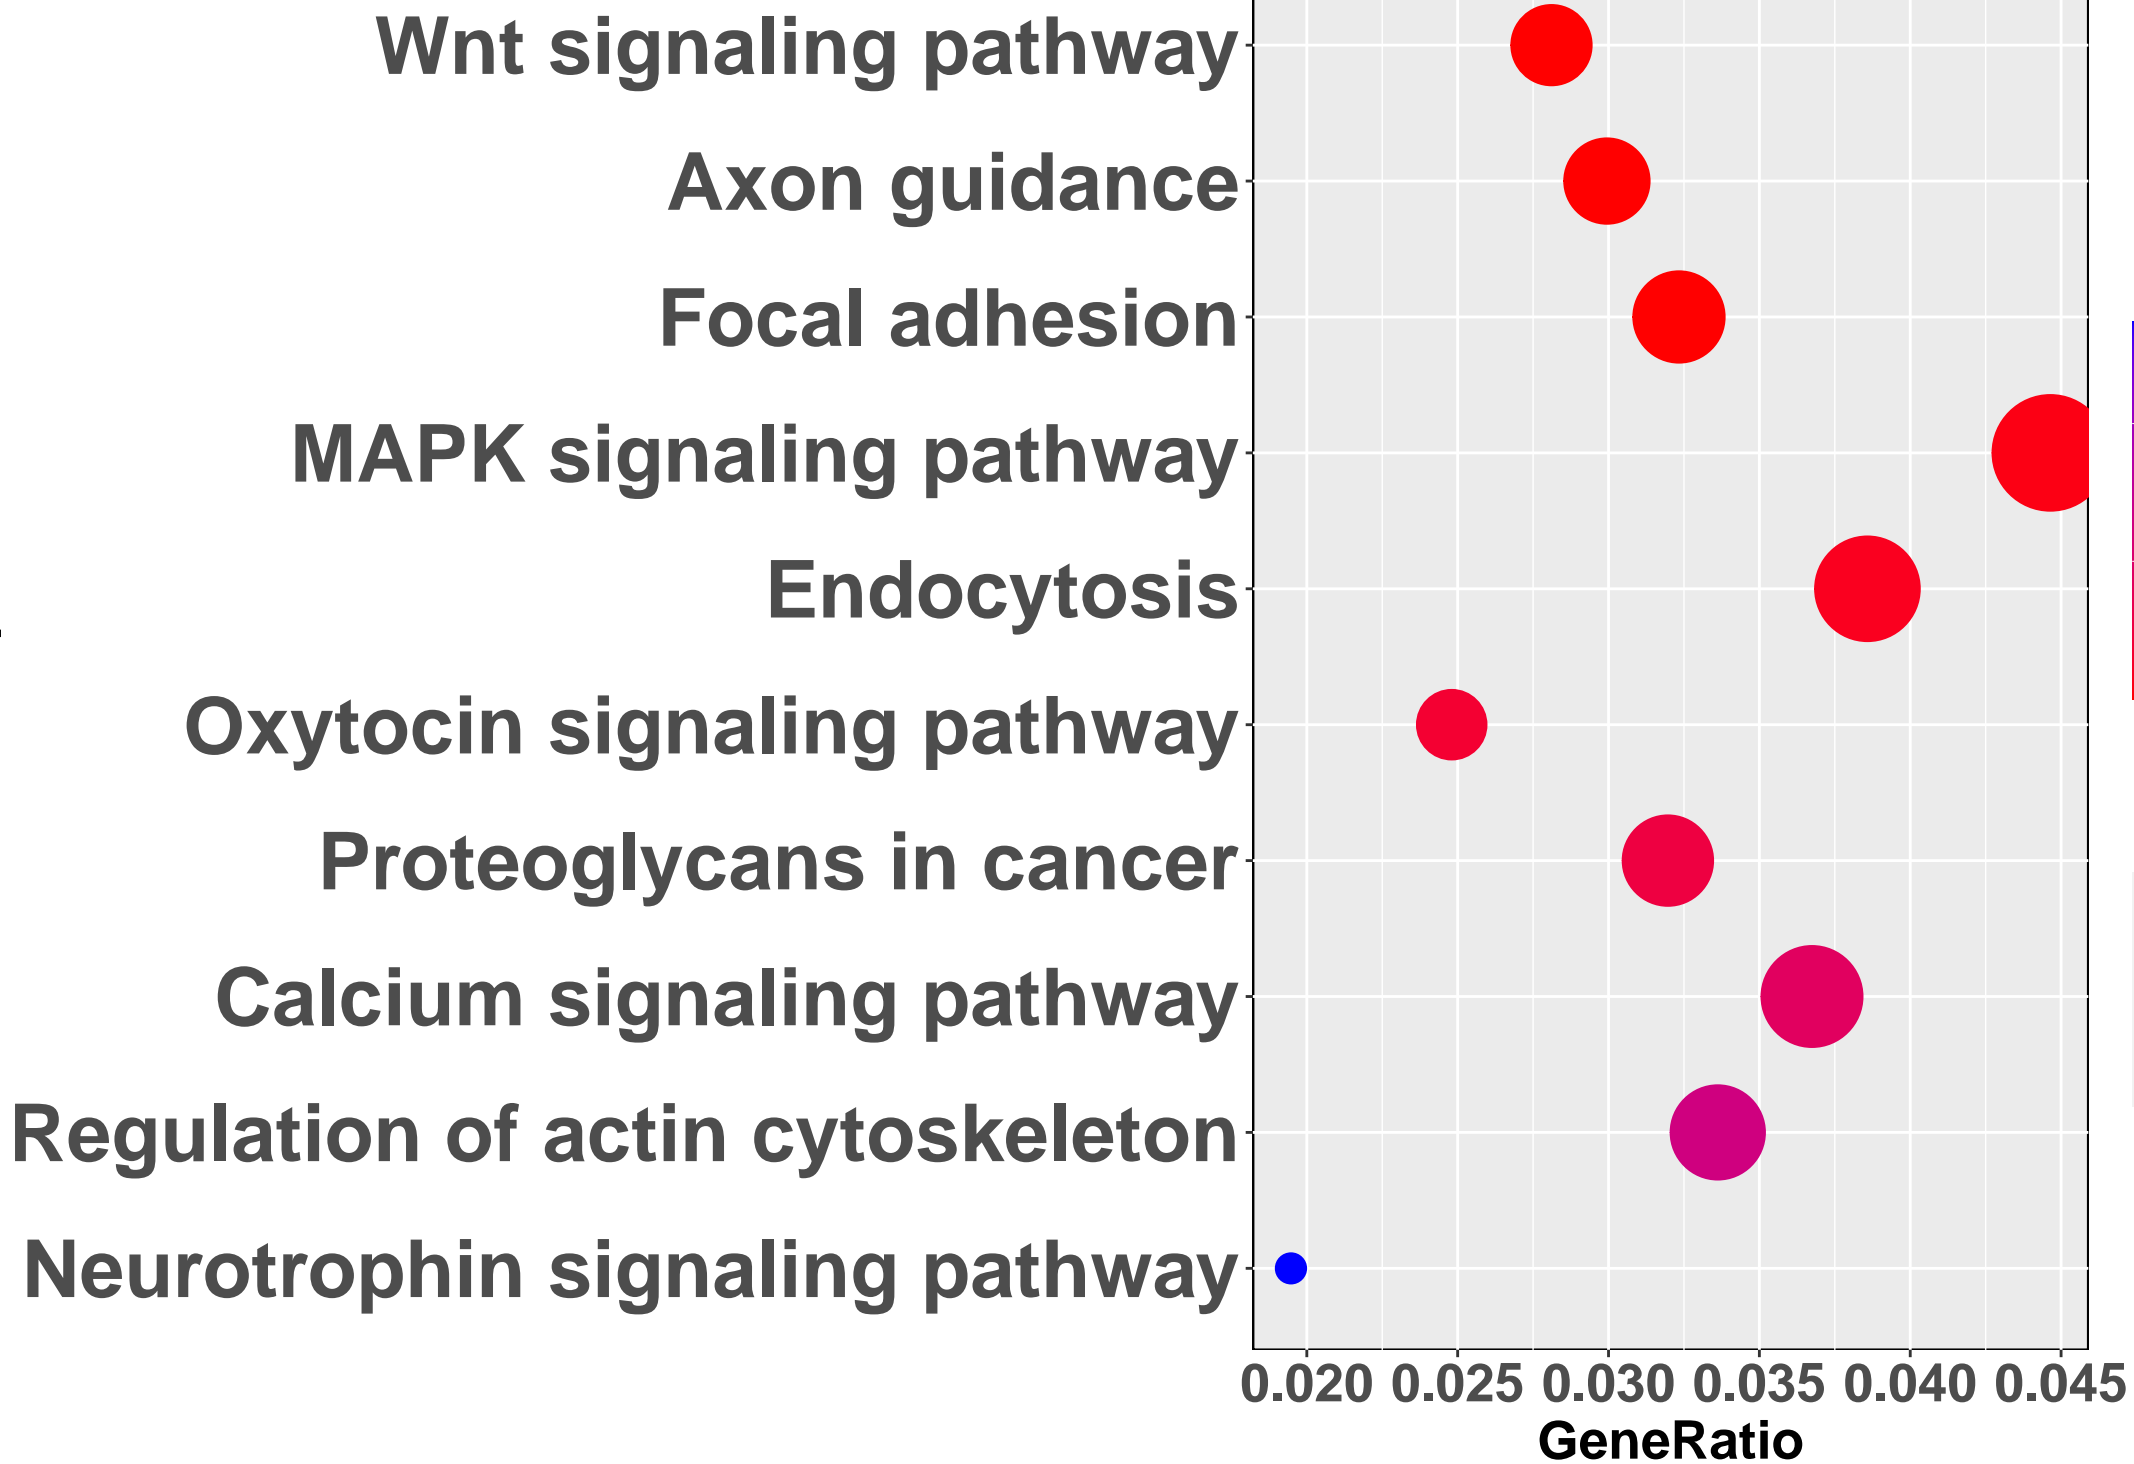

p-value

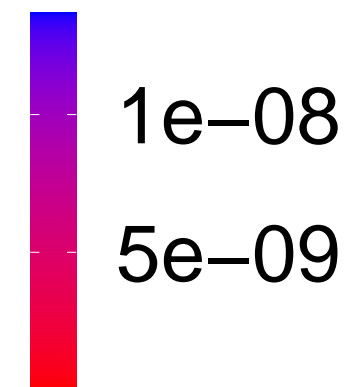

Count

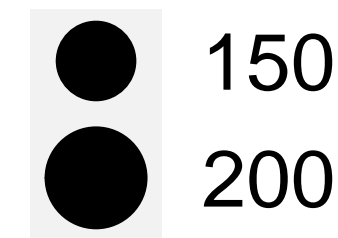

Supplement: SequenceData.zip [file SequenceData.zip]

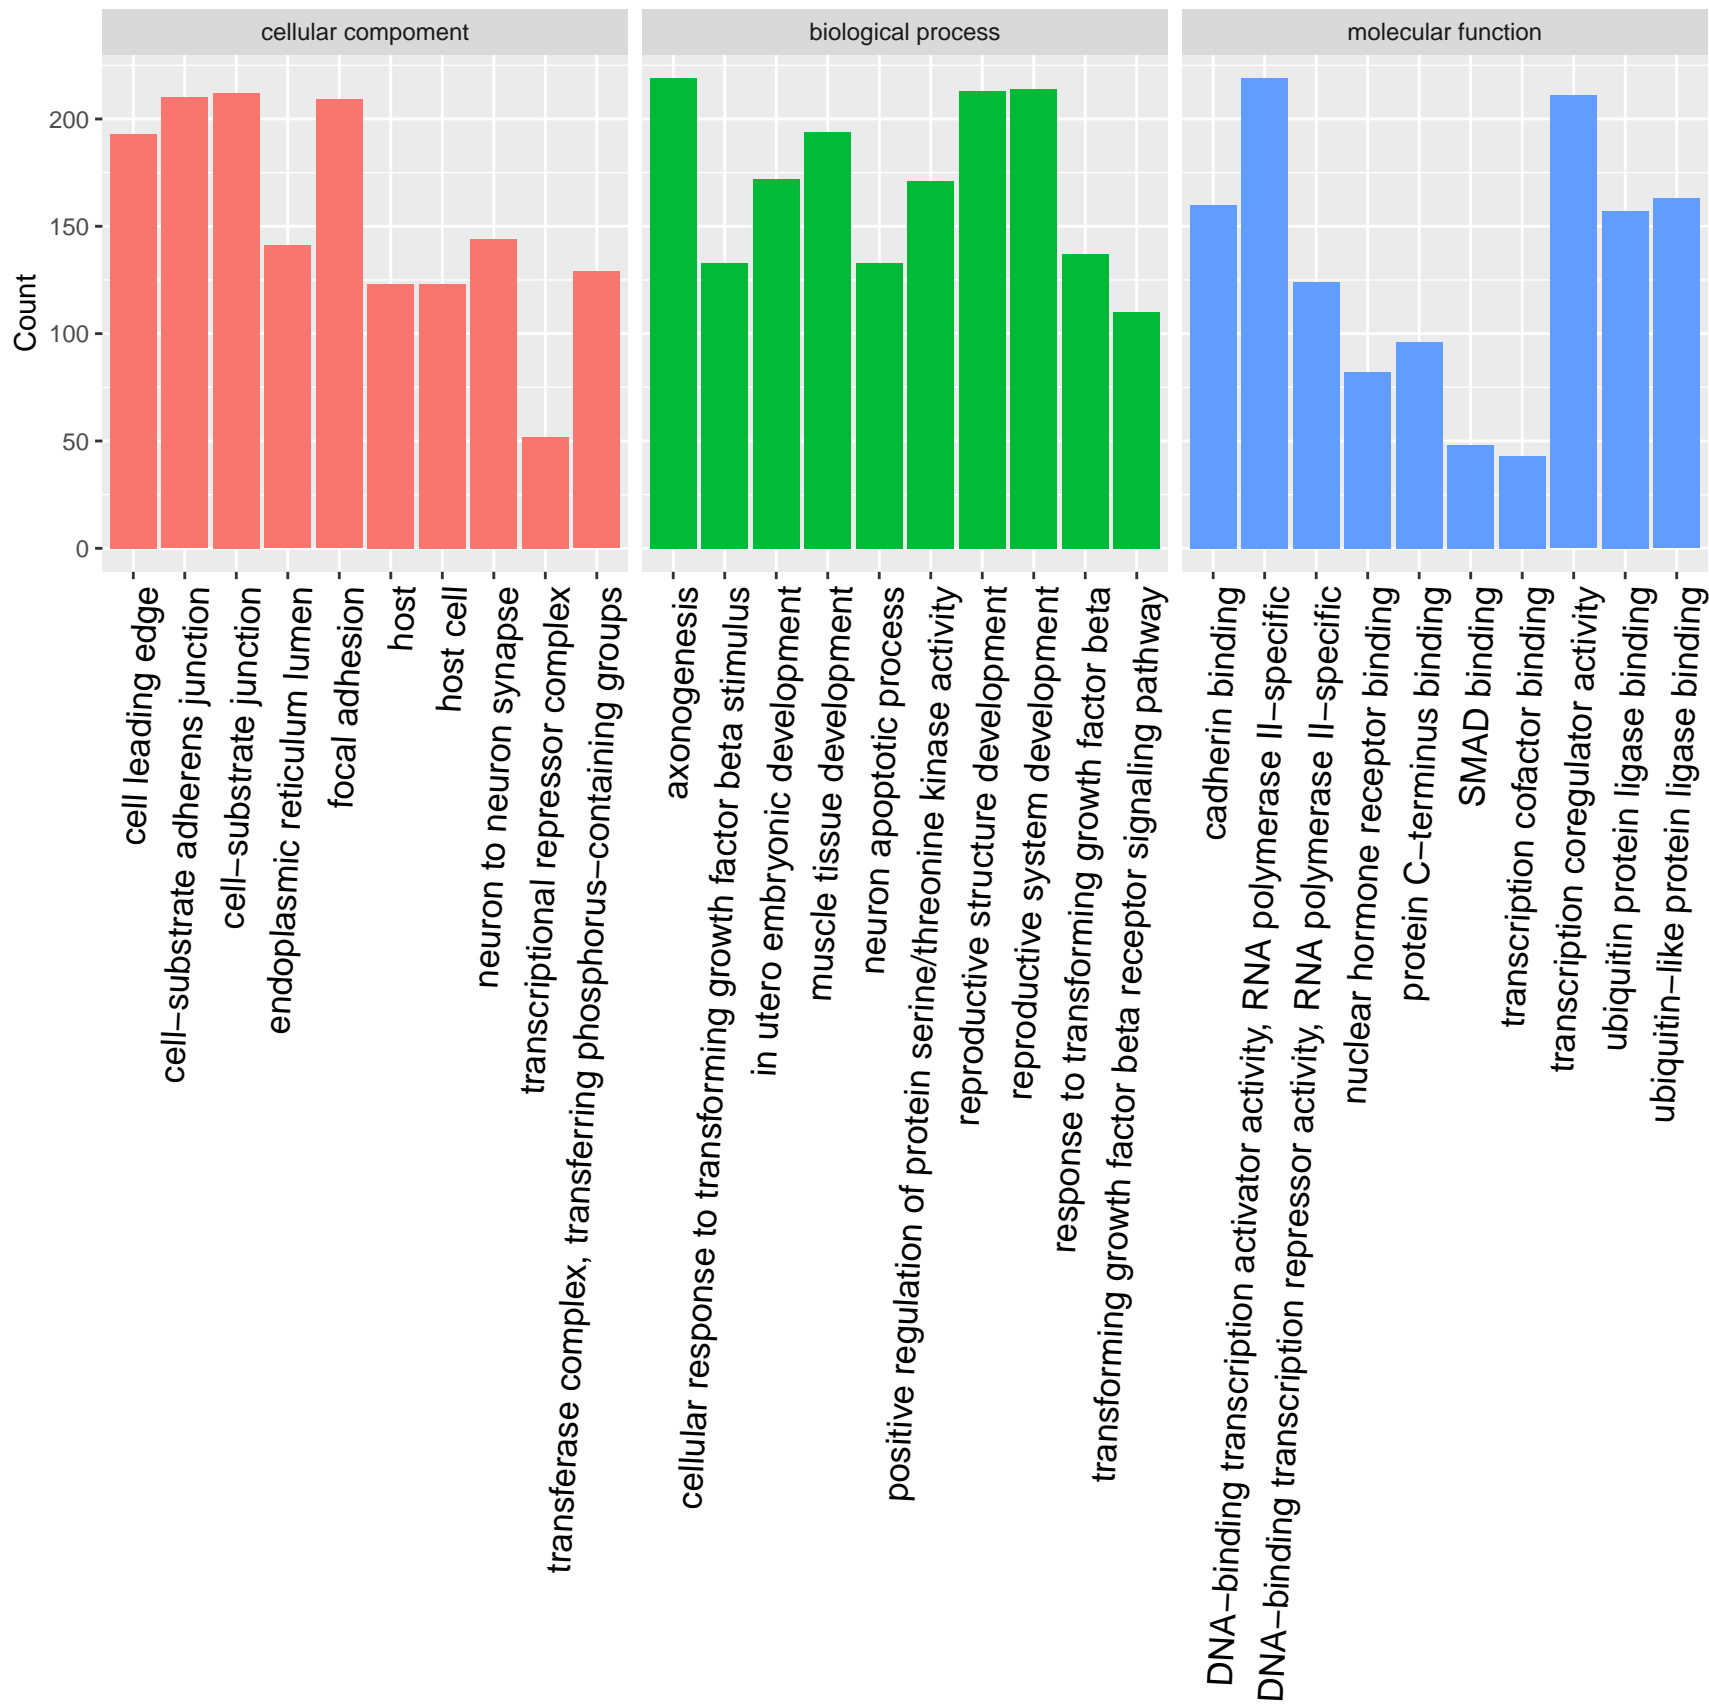

Supplement: SequenceData.zip [file SequenceData.zip]

Heatmap

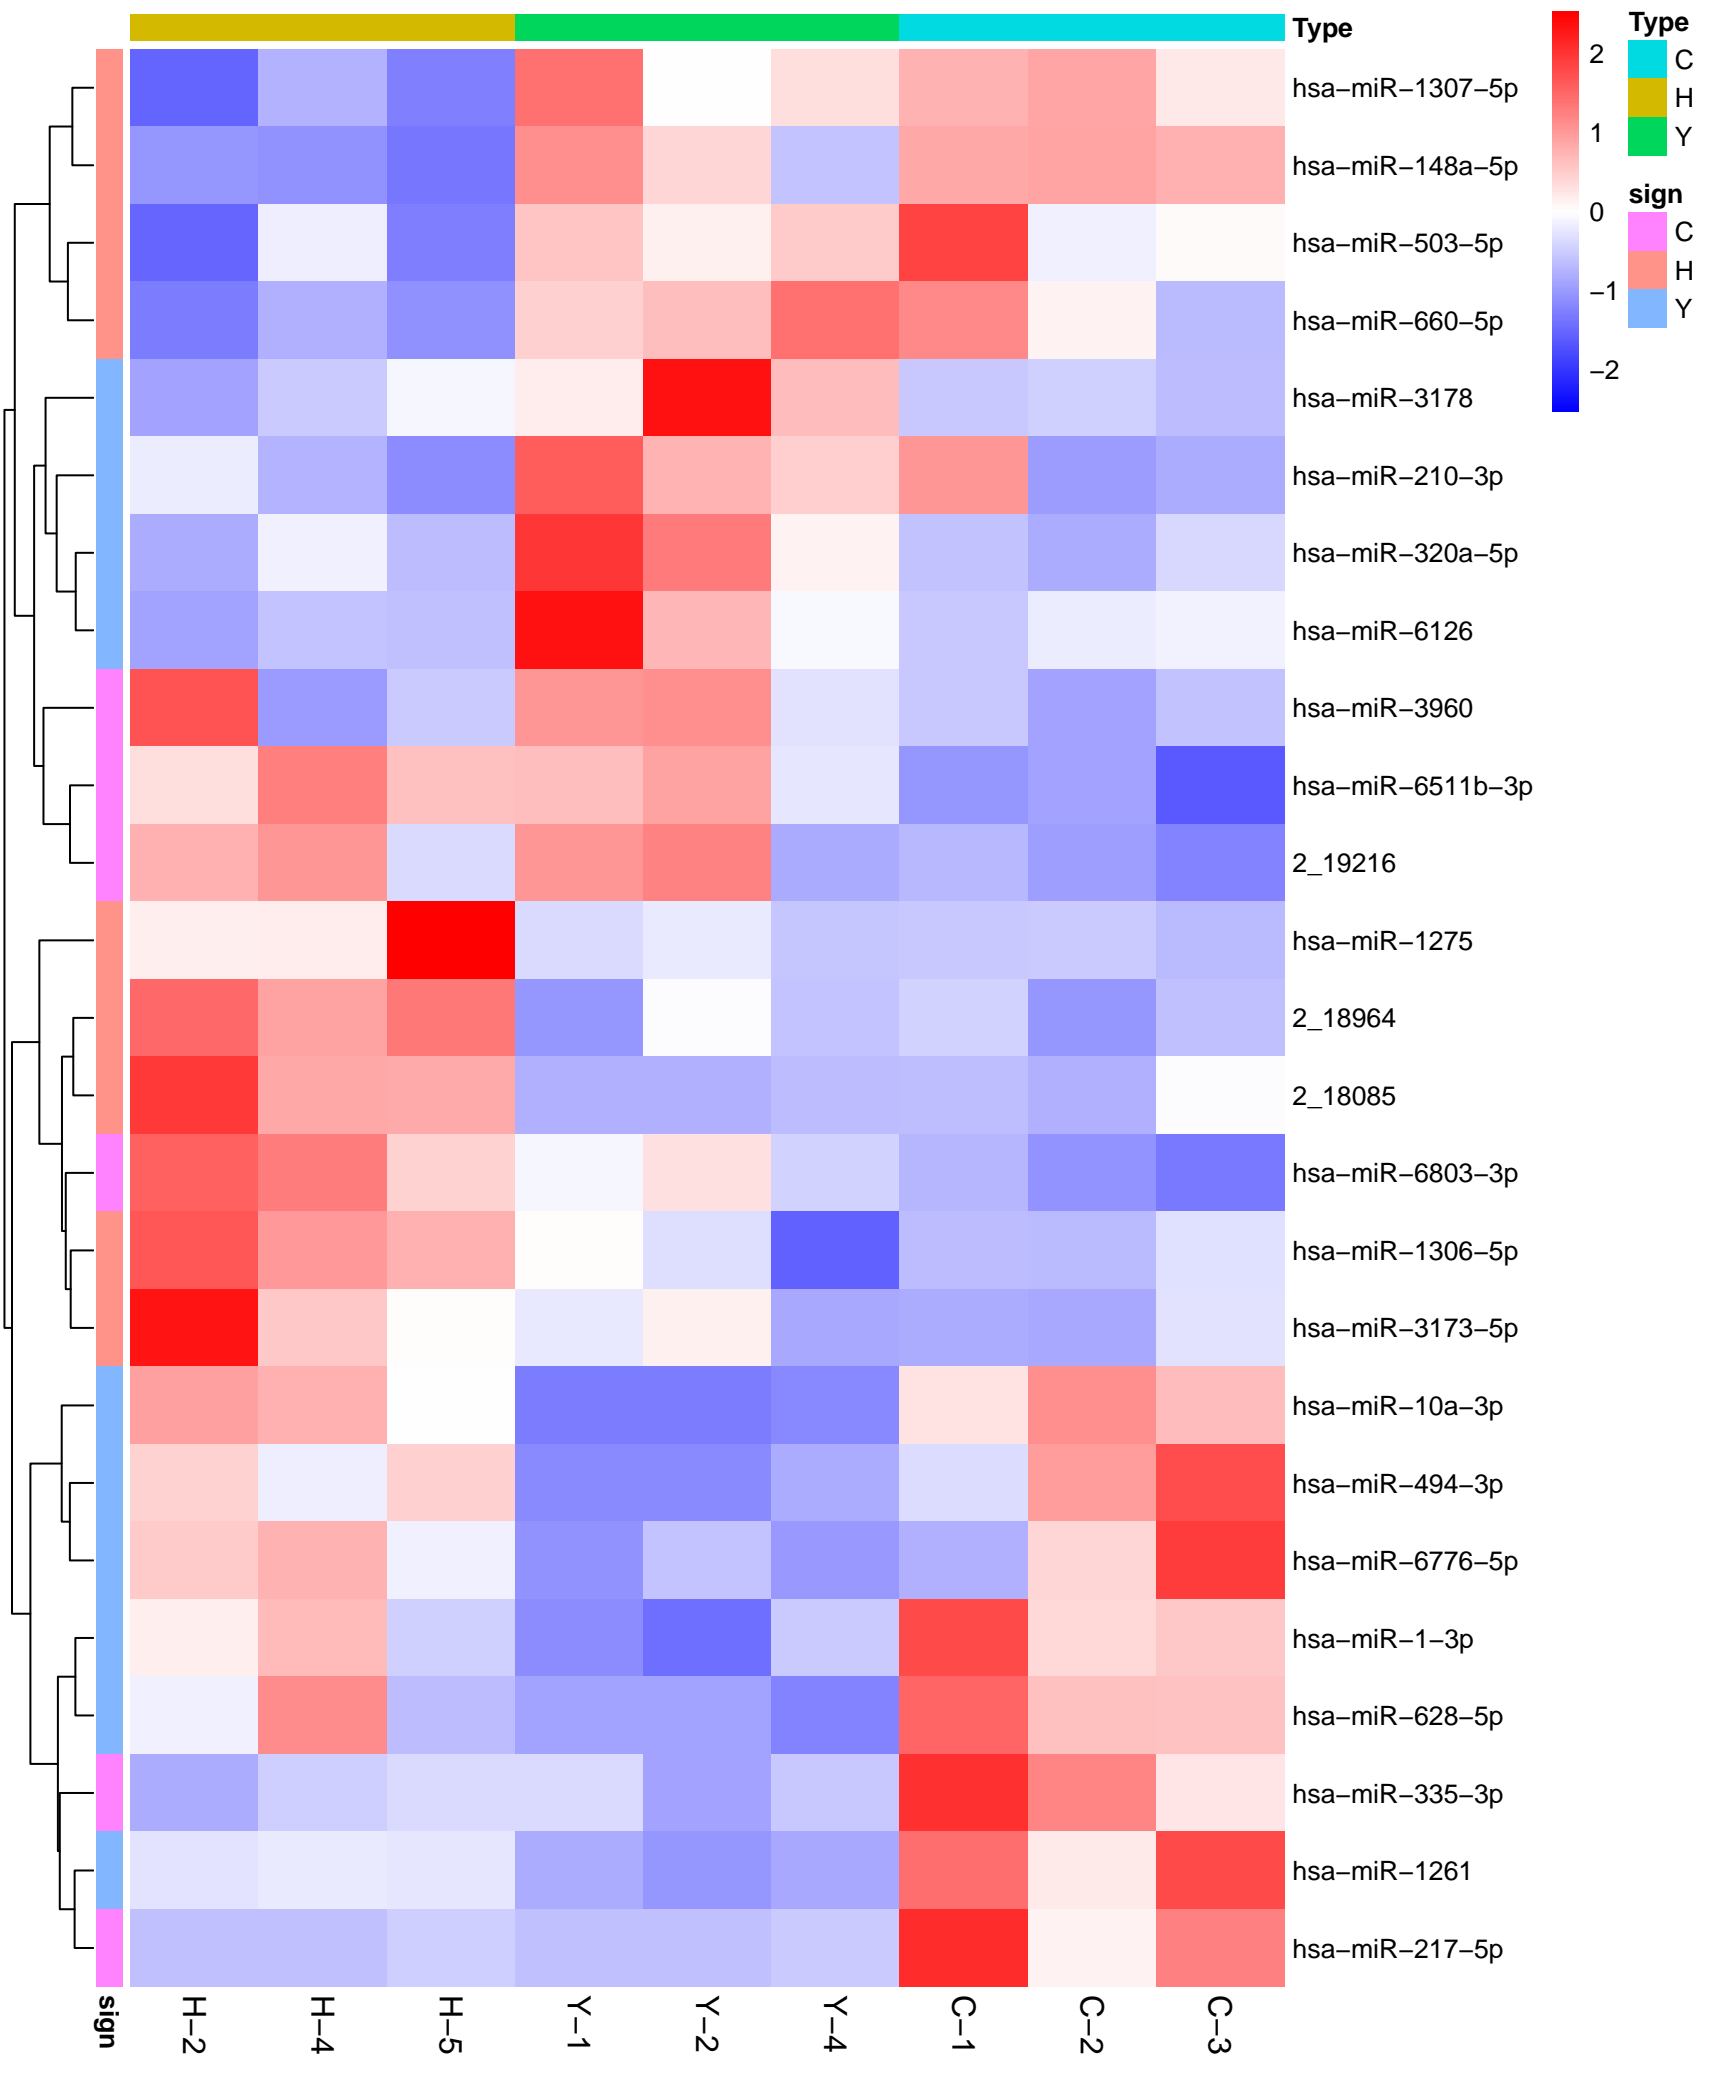

Supplement: SequenceData.zip [file SequenceData.zip]
